# Supplementary material for: Highly stereoselective methylene transfers onto butanediacetal-protected chiral non-racemic sulfinyl imines using S-ylide technology
Source: Royal Society of Chemistry journal article supplement (doi:10.1039/b822779a), 2009-01-01
Supplement: b822779a.pdf [file b822779a.pdf]

# Supporting Information

## Highly Stereoselective Methylene Transfers onto Butanediactal-Protected Chiral Non-Racemic Sulfinyl Imines Using S-Ylide Technology

David C. Forbes,\* Sampada V. Bettigeri, and Susanna C. Pischek

Department of Chemistry, University of South Alabama, Mobile, AL 36688, USA

\*corresponding author: [dforbes@jaguar1.usouthal.edu](mailto:dforbes@jaguar1.usouthal.edu)

### General Experimental Considerations

$^1\text{H}$  NMR (300 MHz) and  $^{13}\text{C}$  NMR (75 MHz) spectra were obtained as solutions in  $\text{CDCl}_3$ . Chemical shifts were reported in parts per million (ppm,  $\delta$ ) and referenced to  $\delta$  7.27 ( $^1\text{H}$  NMR) and  $\delta$  77.00 ( $^{13}\text{C}$  NMR) when using  $\text{CDCl}_3$ . Infrared spectra were recorded using a JASCO FT/IR-4100 and were reported in wavenumbers ( $\text{cm}^{-1}$ ). Optical rotations were recorded on a JASCO P-1020 digital polarimeter and are reported as follows:  $[\alpha]^T$  ( $c = \text{g}/100\text{mL}$ , solvent). TLC analyses were performed on Whatman flexible aluminium backed TLC plates with a fluorescent indicator. Detection was conducted by UV absorption (254 nm) and charring with 10%  $\text{KMnO}_4$  in water. Except for the aziridines and oxiranes, the purification of all materials by column chromatography was performed using silica gel. All chromatographic separations of aziridines and oxiranes were performed using neutral alumina. All chemicals used for synthetic procedures were reagent grade or better. Solutions were concentrated in vacuo with a rotary evaporator and the residue was purified by the specified procedure.

**Representative procedure for the preparation of butanediactal-protected sulfinyl imines<sup>1</sup>**

To a 50 ml round-bottomed flask equipped with a stir bar and septum was added aldehyde (1.5 equiv) as a solution in anhydrous dichloromethane (3.0 mL). Next added was anhydrous copper sulfate (2.0 equiv) and 2-methyl-2-propane sulfinamide (1.0 equiv). The reaction mixture was allowed to stir under an argon atmosphere for a period of 24h at which time the reaction was monitored by TLC until complete. When complete as judged by TLC analysis, the reaction mixture was filtered through a Celite plug and rinsed with dichloromethane. After concentration of the filtrate in vacuo, the crude reaction mixture was immediately purified by silica gel chromatography (radial chromatography) using a gradient eluent system of hexanes and EtOAc (9:1) to afford analytically pure *N*-sulfinyl imine.

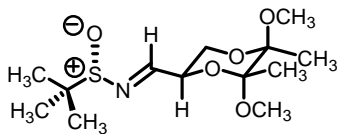

***[S(S), N(E)]-2-methyl-N-(((2S,5R,6R)-5,6-dimethoxy-5,6-dimethyl-1,4-dioxacyclohexyl)methylene]-2-propanesulfinamide (4)*** From the combination of 0.242 g (2 mmol) (S)-(-)-2-methyl-2-propane sulfinamide, 0.612 g (3 mmol) (2R,5R,6R)-2-(5,6-dimethoxy-5,6-dimethyl-1,4-dioxacyclohexane)carboxyaldehyde and 0.640 g (4 mmol) CuSO<sub>4</sub>, 0.758 g (82%) of the title compound was isolated as an white solid after silica gel chromatography. Analytical data:  $[\alpha]_D^{25} +87.5$  (*c* 1.0, CHCl<sub>3</sub>); mp 107-109°C; IR (cm<sup>-1</sup>) 3090, 2952, 1628, 1455, 1210, 1089; <sup>1</sup>H NMR (300 MHz, CDCl<sub>3</sub>) δ 8.03 (d, *J* = 3.0, 1H), 4.79-4.73 (m, 1H), 3.76-3.64 (m, 2H), 3.32 (s, 3H), 3.28 (s, 3H), 1.36 (s, 3H), 1.32, (s, 3H), 1.19 (s, 9H); <sup>13</sup>C NMR (75 MHz, CDCl<sub>3</sub>) δ 166.5, 99.6, 98.2, 69.6, 60.2, 56.8, 48.3, 48.1, 22.4, 17.7, 17.6; TLC R<sub>f</sub> 0.38 (EtOAc/hexane, 2/8); HRMS (ESI) calculated mass 308.1532 (C<sub>13</sub>H<sub>25</sub>NO<sub>5</sub>S (M+H)); found 308.1537.

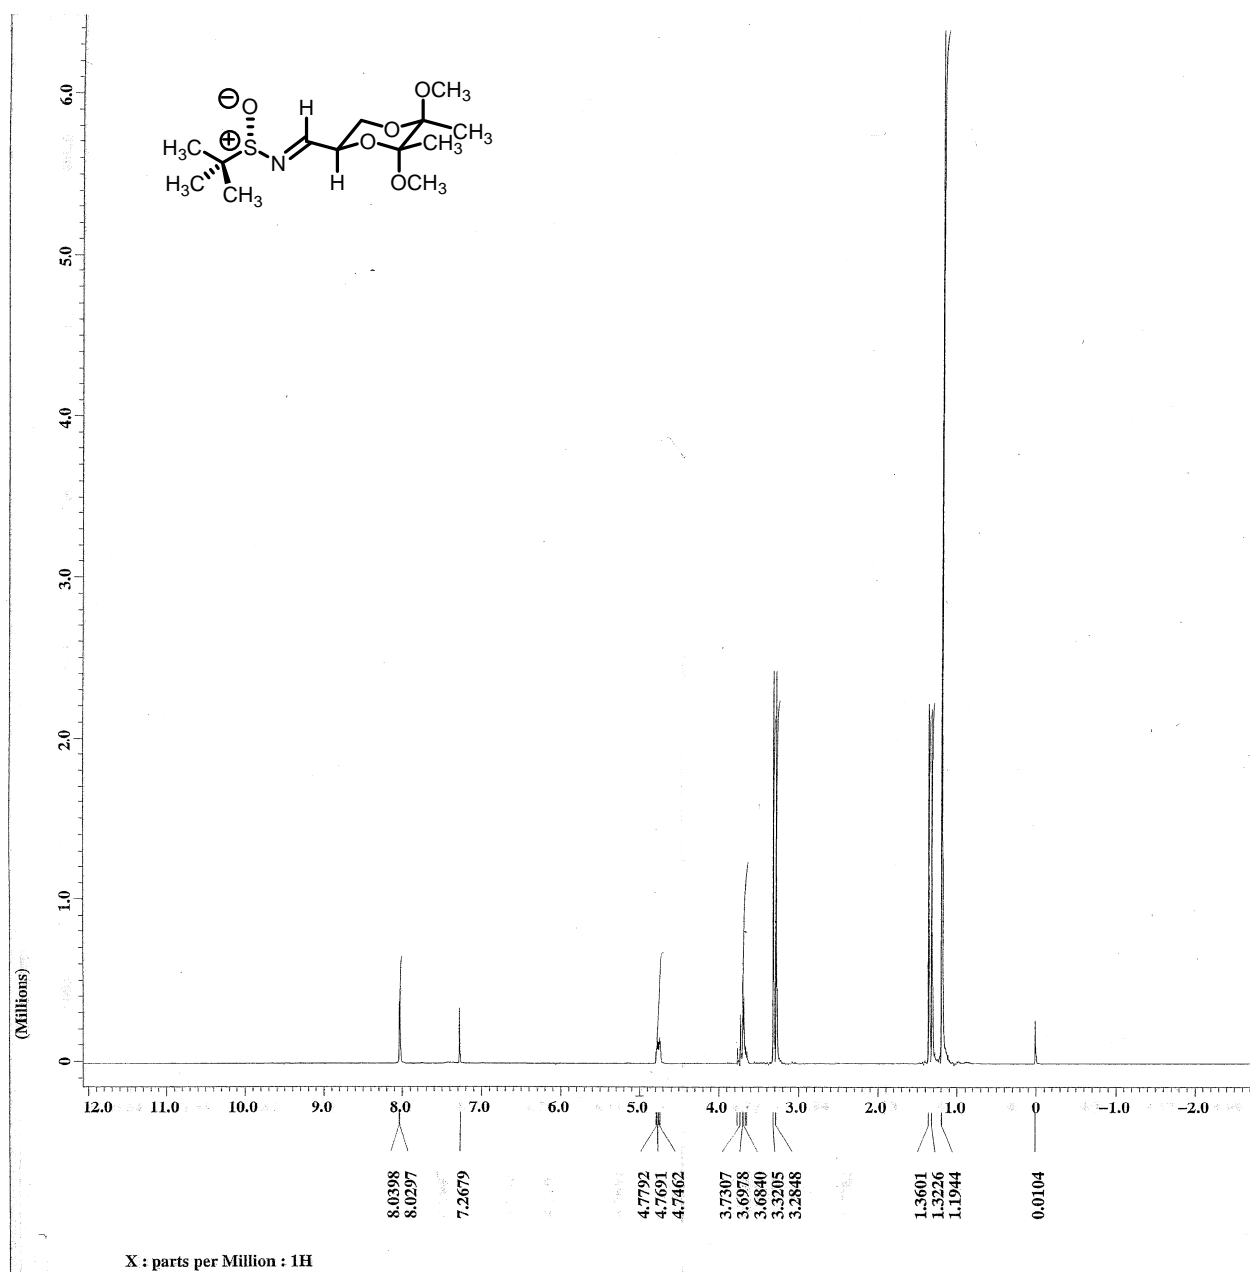

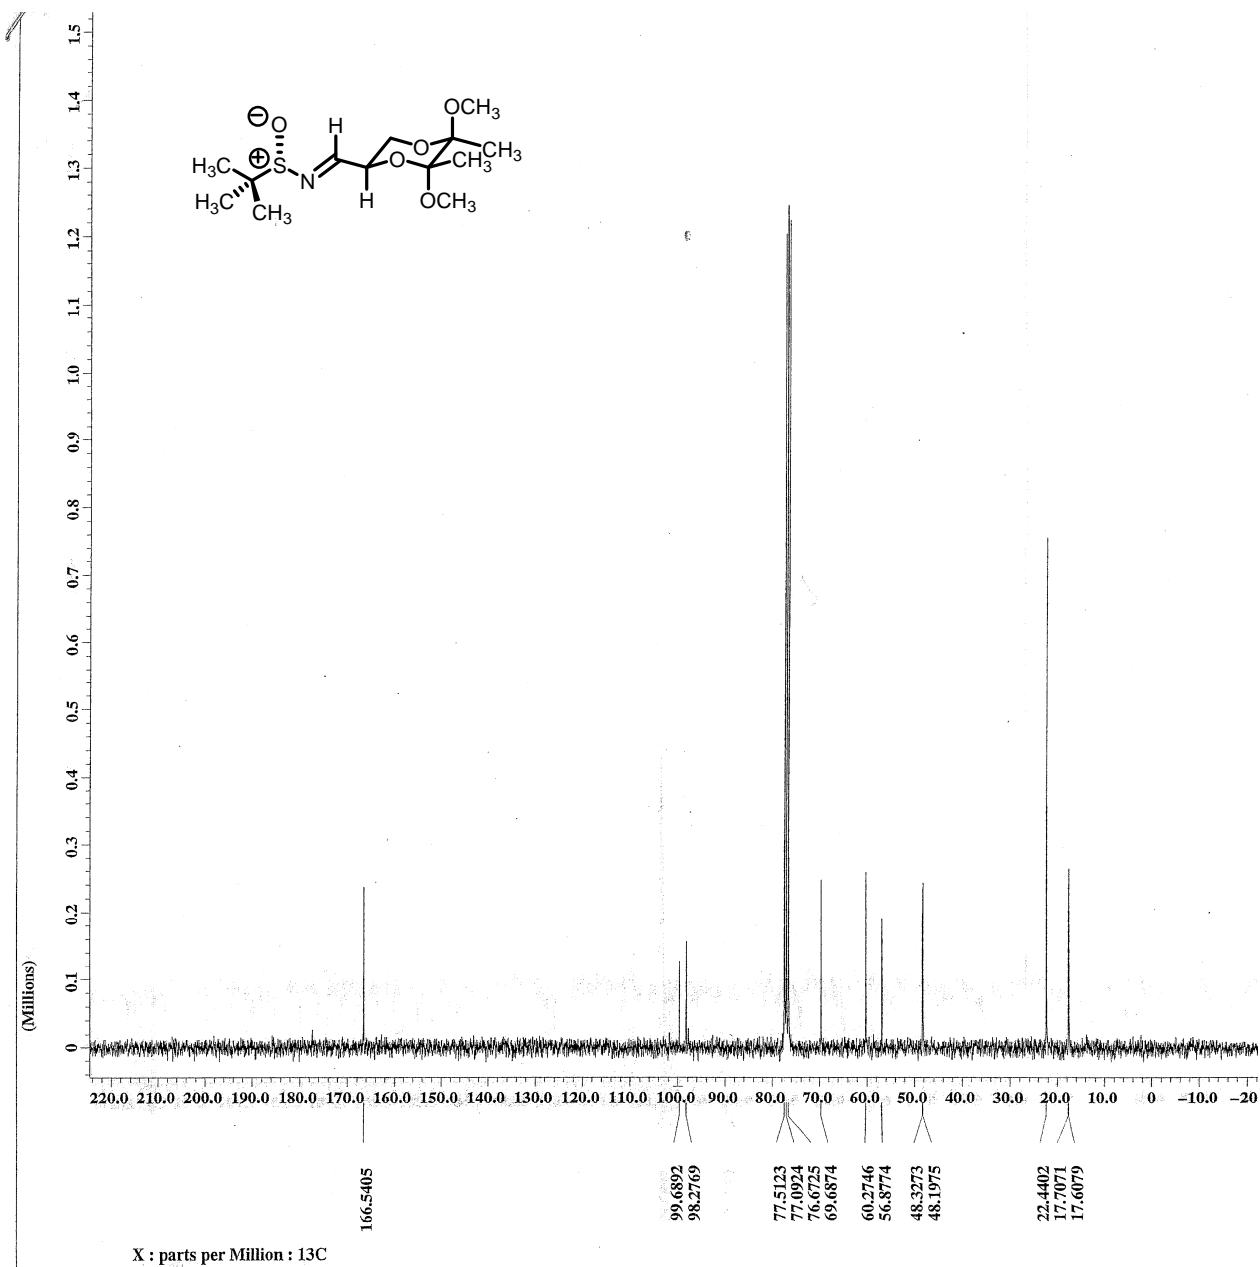

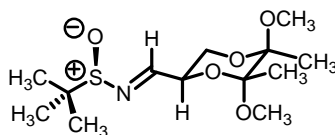

***[S(R), N(E)]-2-methyl-N-[(2S,5R,6R)-5,6-dimethoxy-5,6-dimethyl-1,4-dioxacyclohexyl)methylene]-2-propanesulfonamide (5)*** From the combination of 0.242 g (2 mmol) (*R*)-(-)-2-methyl-2-propane sulfonamide, 0.612 g (3 mmol) (2*R*,5*R*,6*R*)-2-(5,6-dimethoxy-5,6-dimethyl-1,4-dioxacyclohexane)carboxyaldehyde and 0.640 g (4 mmol) CuSO<sub>4</sub>, 0.465 g (74%) of the title compound was isolated as a white solid after silica gel chromatography. Analytical data:  $[\alpha]_D^{25}$  -274.5 (*c* 1.0, CHCl<sub>3</sub>); mp 113-115 °C; IR (cm<sup>-1</sup>) 2981, 2951, 1624, 1456, 1213, 1134, 1087; <sup>1</sup>H NMR (300 MHz, CDCl<sub>3</sub>) δ 8.04 (d, *J* = 2.7, 1H), 4.70-4.66 (m, 1H), 3.87-3.80 (m, 1H), 3.72-3.69 (m, 1H), 3.32 (s, 3H), 3.28 (s, 3H), 1.35 (s, 3H), 1.31 (s, 3H), 1.19 (s, 9H); <sup>13</sup>C NMR (75 MHz, CDCl<sub>3</sub>) δ 166.2, 99.2, 98.2, 68.8, 60.1, 57.0, 48.2, 48.1, 22.3, 17.6, 17.5; TLC R<sub>f</sub> 0.38 (EtOAc/hexane, 2/8); HRMS (ESI) calculated mass 308.1532 (C<sub>13</sub>H<sub>25</sub>NO<sub>5</sub>S (M+H)); found 308.1523.

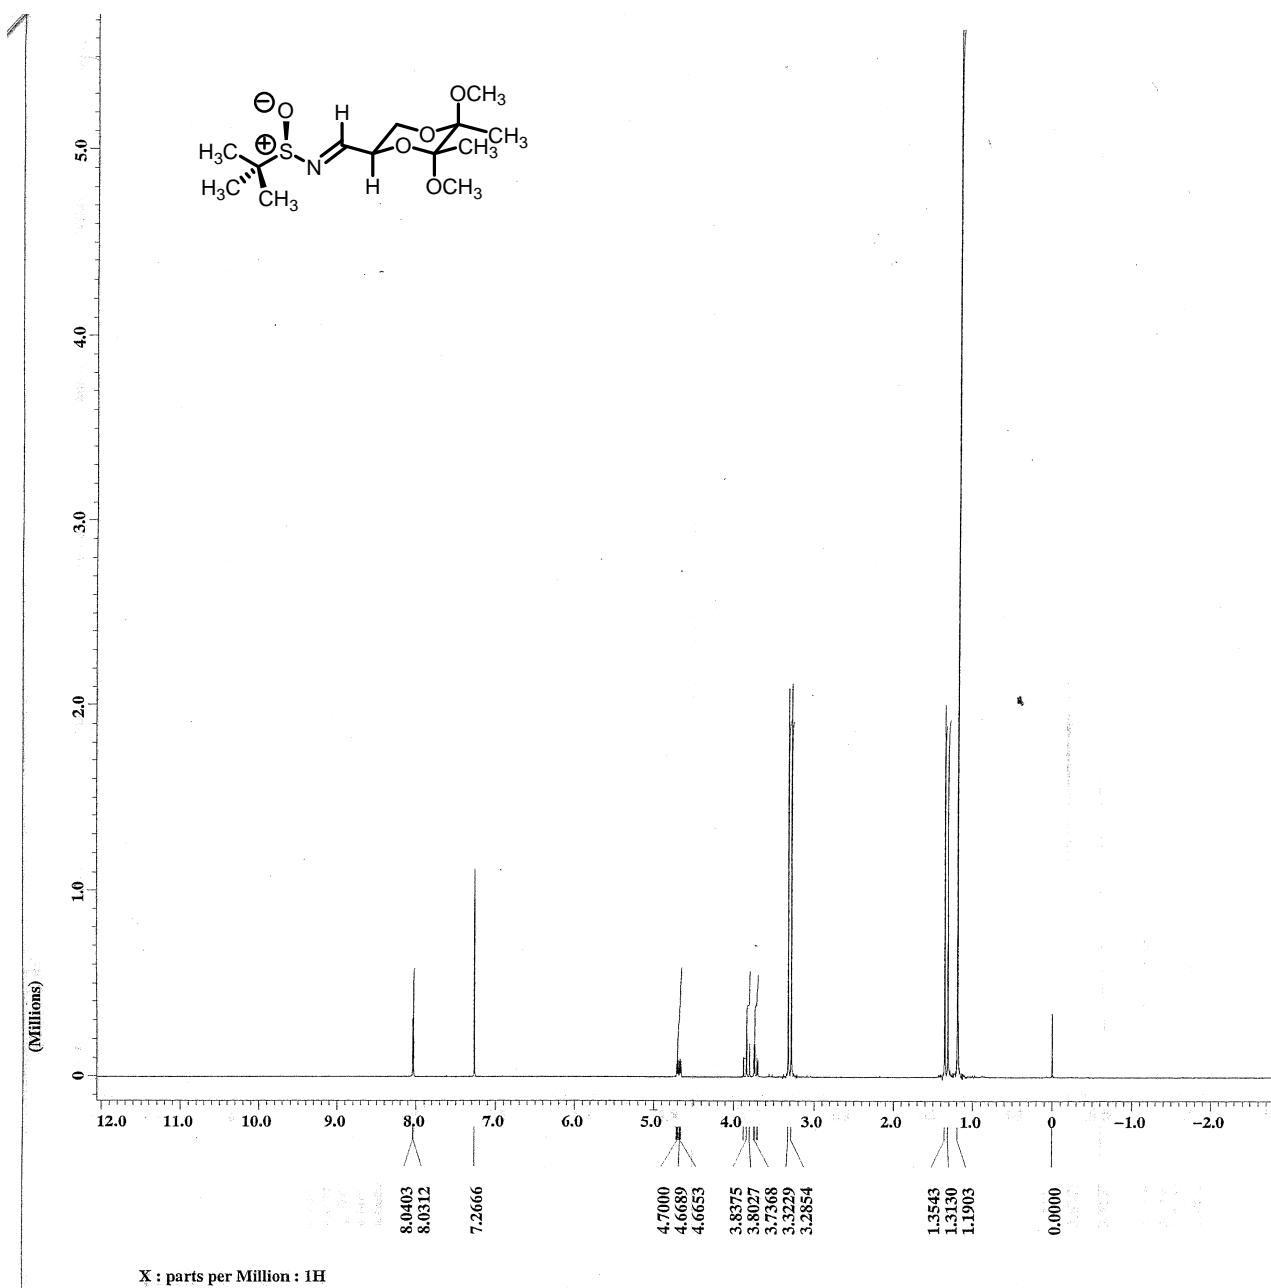

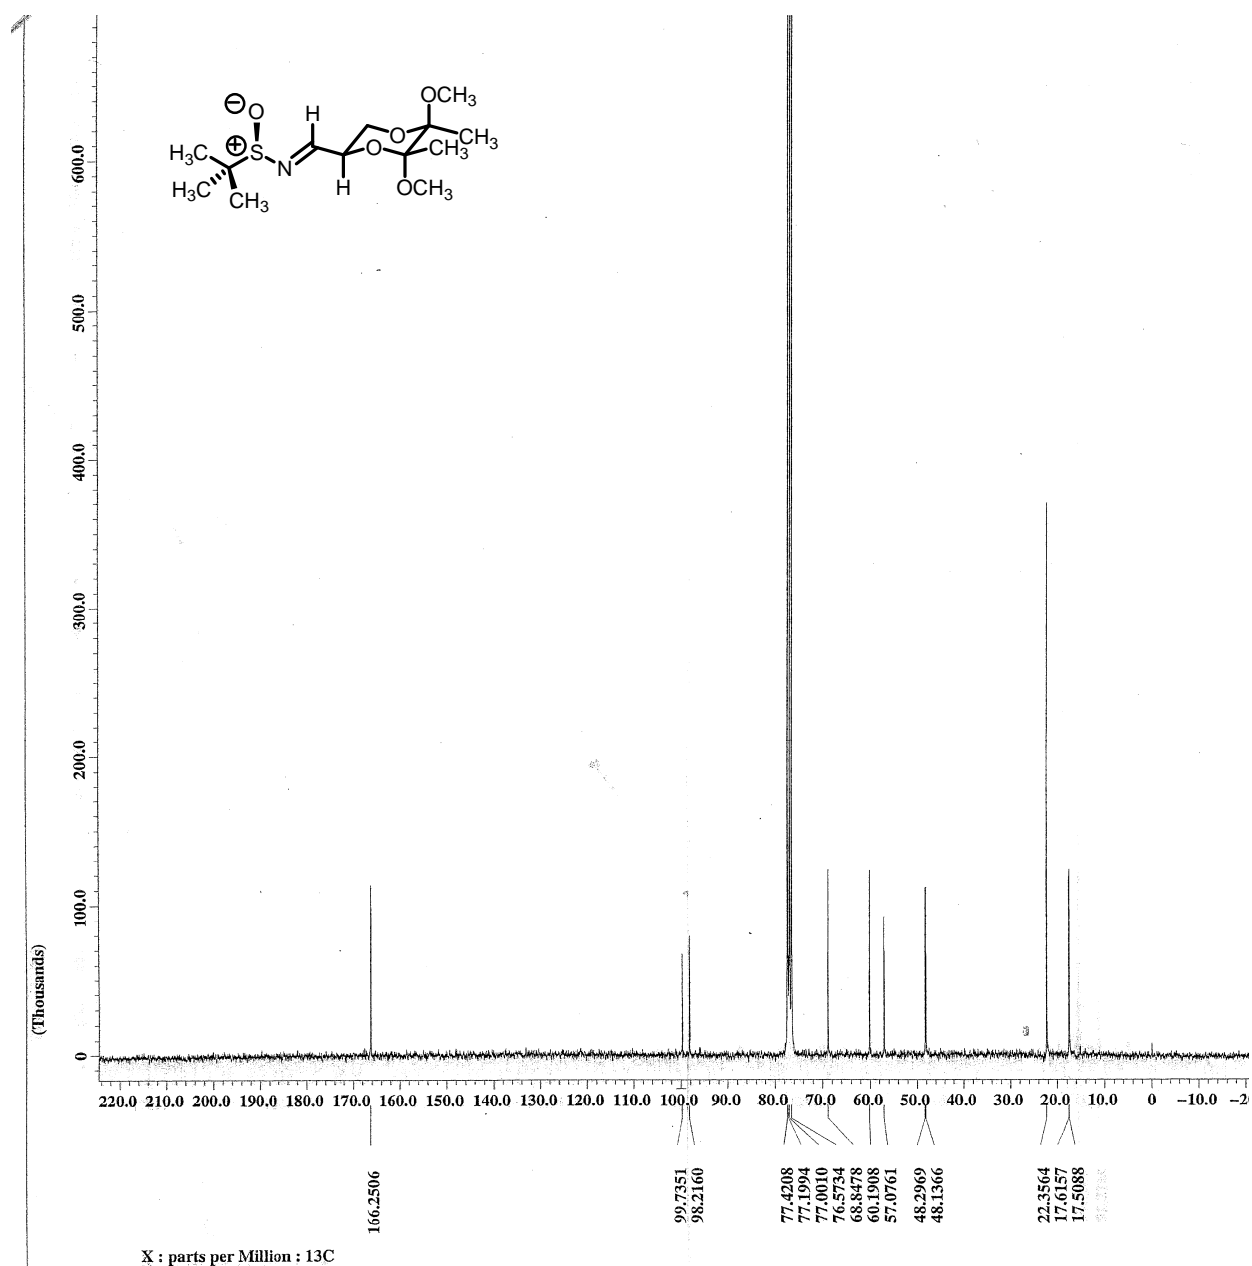



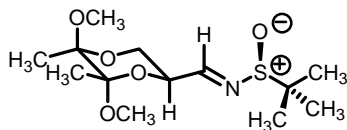

**[S(S), N(E)]-2-methyl-N-(((2R,5S,6S)-5,6-dimethoxy-5,6-dimethyl-1,4-dioxacyclohexyl)methylene)-2-propanesulfonamide (ent-5)** From the combination of 0.242 g (2 mmol) (S)-(-)-2-methyl-2-propane sulfonamide, 0.612 g (3 mmol) (2S,5S,6S)-2-(5,6-dimethoxy-5,6-dimethyl-1,4-dioxacyclohexane)carboxyaldehyde and 0.640 g (4 mmol) CuSO<sub>4</sub>, 0.440 g (71%) of the title compound was isolated as an white solid after silica gel chromatography. Analytical data:  $[\alpha]_{\text{D}}^{25} +275.0$  (c 1.0, CHCl<sub>3</sub>); mp 112-113 °C, IR (cm<sup>-1</sup>) 2982, 2944, 1625, 1456, 1267, 1087; <sup>1</sup>H NMR (300 MHz, CDCl<sub>3</sub>) δ 8.04 (d, *J* = 2.7, 1H), 4.71-4.65 (m, 1H), 3.87-3.80 (m, 1H), 3.74-3.69 (m, 1H), 3.32 (s, 3H), 3.28 (s, 3H), 1.35 (s, 3H), 1.31 (s, 3H), 1.19 (s, 9H); <sup>13</sup>C NMR (75 MHz, CDCl<sub>3</sub>) δ 166.2, 99.7, 98.2, 68.8, 60.2, 57.0, 48.3, 48.1, 22.3, 17.6, 17.5; TLC R<sub>f</sub> 0.40 (EtOAc/hexane, 2/8). HRMS (ESI) calculated mass 308.1532 (C<sub>13</sub>H<sub>25</sub>NO<sub>5</sub>S (M+H)); found 308.1537.

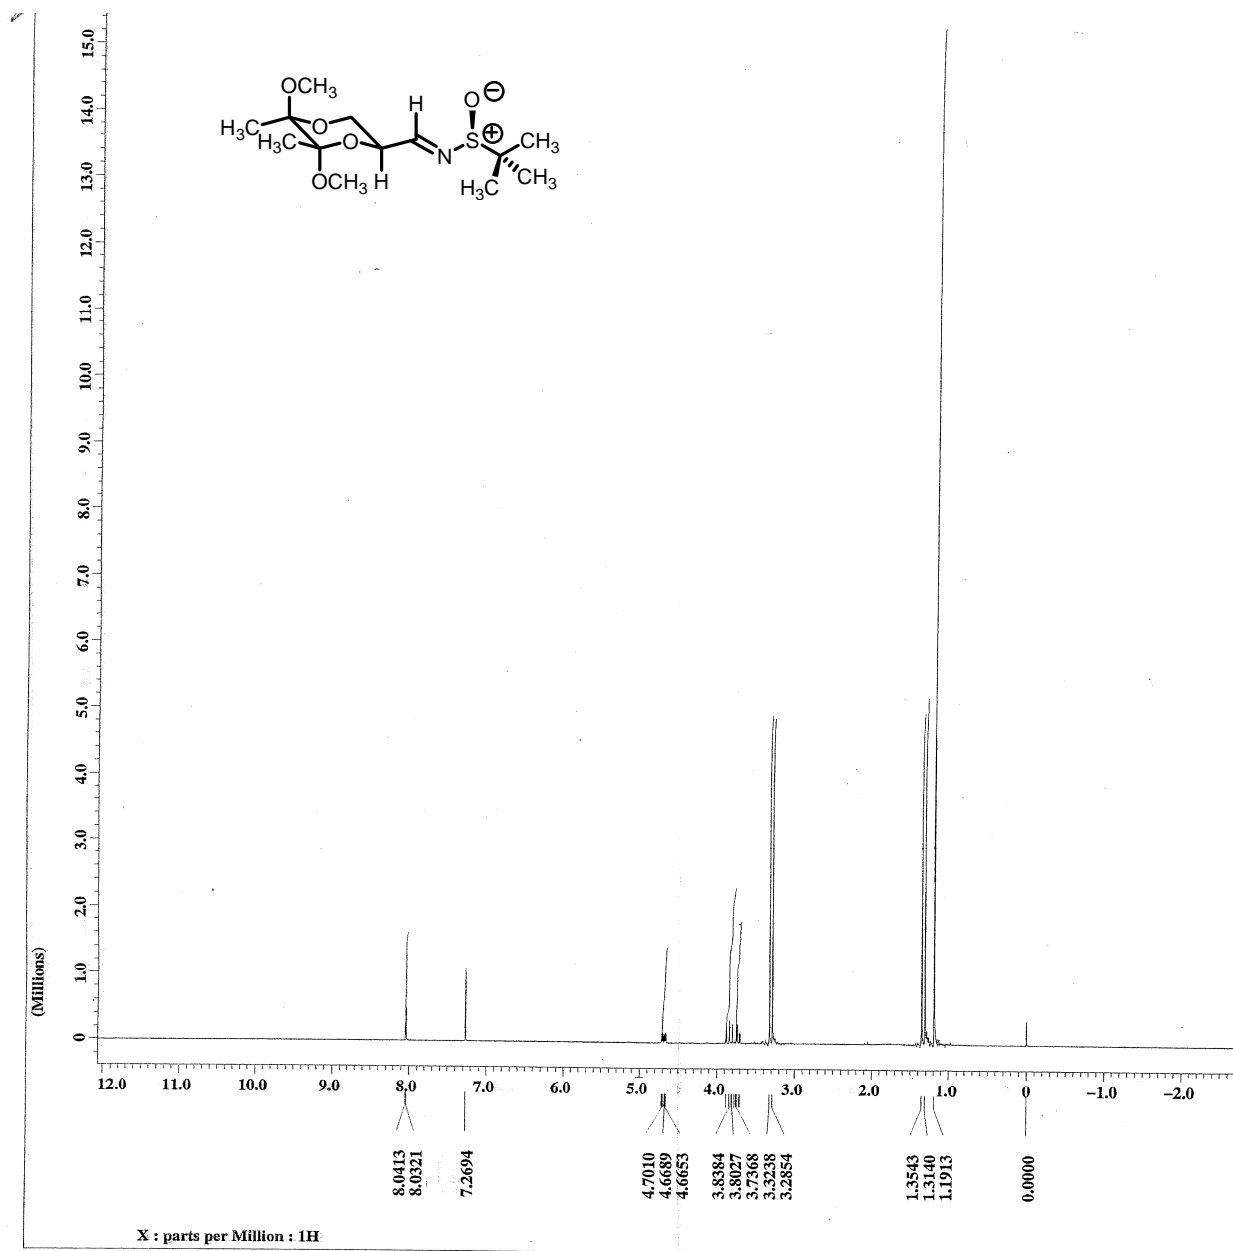

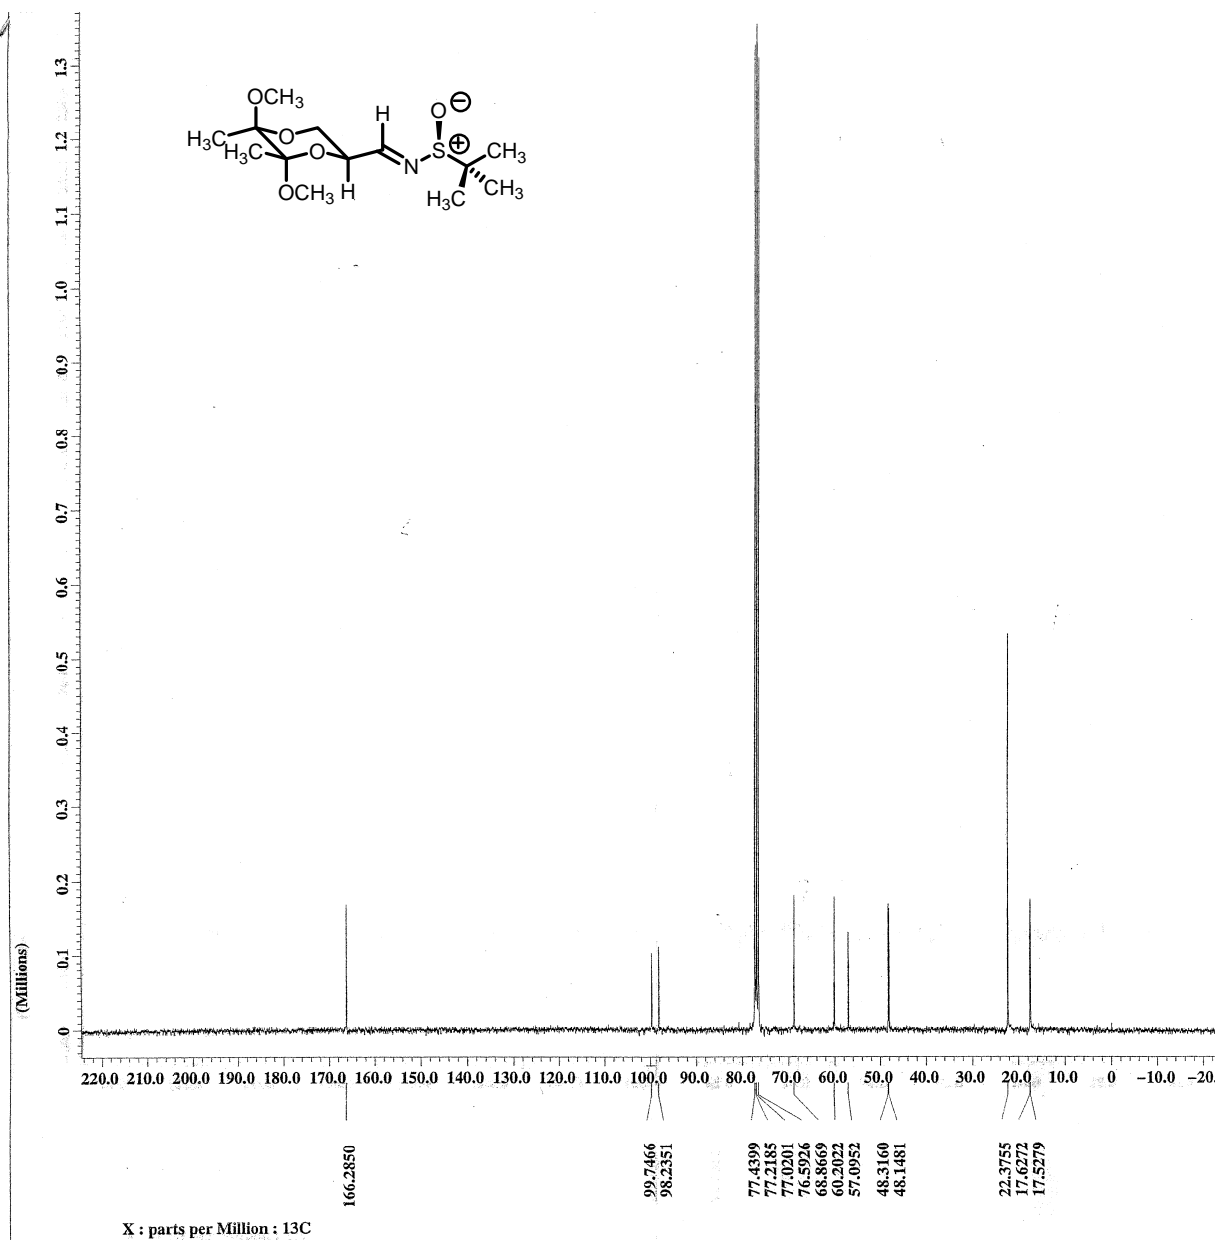

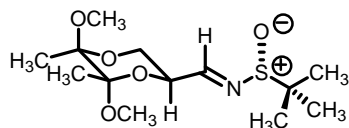

***[S(R), N(E)]-2-methyl-N-[(2R,5S,6S)-5,6-dimethoxy-5,6-dimethyl-1,4-dioxacyclohexyl)methylene]-2-propanesulfinamide (ent-4)*** From the mixture of 0.242 g (2 mmol) (*R*)-(-)-2-methyl-2-propane sulfinamide, 0.612 g (3 mmol) (2*S*,5*S*,6*S*)-2-(5,6-dimethoxy-5,6-dimethyl-1,4-dioxacyclohexane)carboxyaldehyde, and 0.640 g (4 mmol) CuSO<sub>4</sub>, 0.435 g (70%) of the title compound was isolated as an white solid after silica gel chromatography. Analytical data:  $[\alpha]_D^{25}$  -88.0 (*c* 1.0, CHCl<sub>3</sub>), mp 106-108 °C IR (cm<sup>-1</sup>) 2979, 2925, 1626, 1457, 1211, 1143, 1089; <sup>1</sup>H NMR (300 MHz, CDCl<sub>3</sub>) δ 8.03 (d, *J* = 2.7, 1H), 4.77-4.73 (m, 1H), 3.75-3.66 (m, 2H), 3.30 (s, 3H), 3.25 (s, 3H), 1.35 (s, 3H), 1.31, (s, 3H), 1.18 (s, 9H); <sup>13</sup>C NMR (75 MHz, CDCl<sub>3</sub>) δ 166.3, 99.4, 98.0, 69.4, 60.0, 56.6, 48.1, 47.9, 22.2, 17.5, 17.4; TLC R<sub>f</sub> 0.39 (EtOAc/hexane, 2/8). HRMS (ESI) calculated mass 308.1532 (C<sub>13</sub>H<sub>25</sub>NO<sub>5</sub>S (M+H)); found 308.1531.

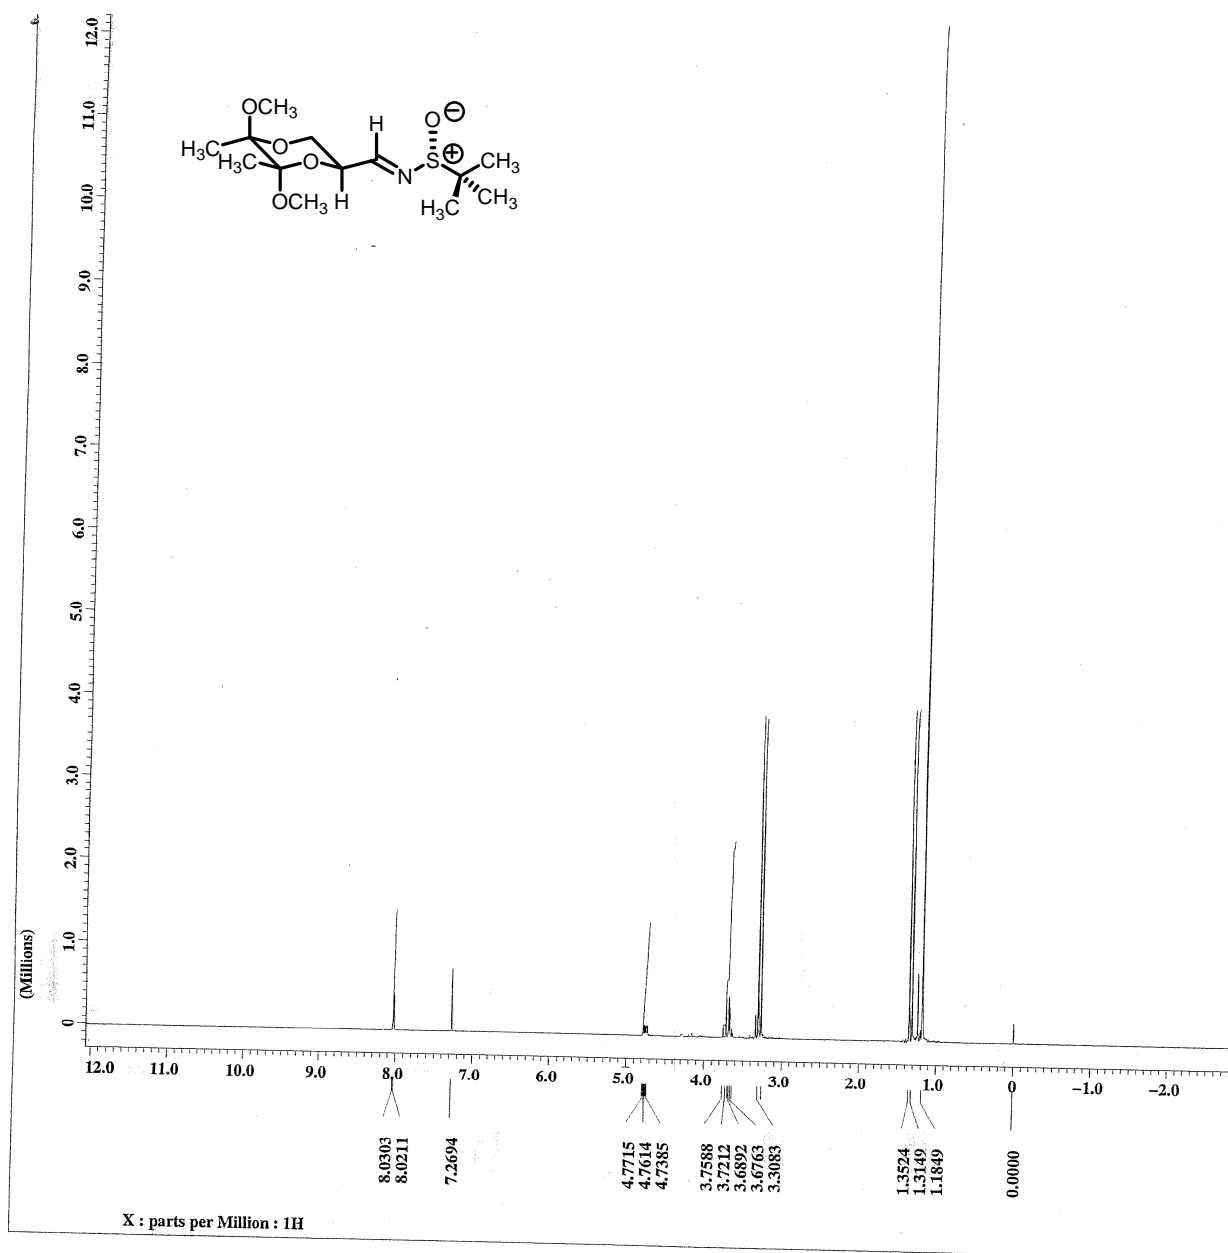

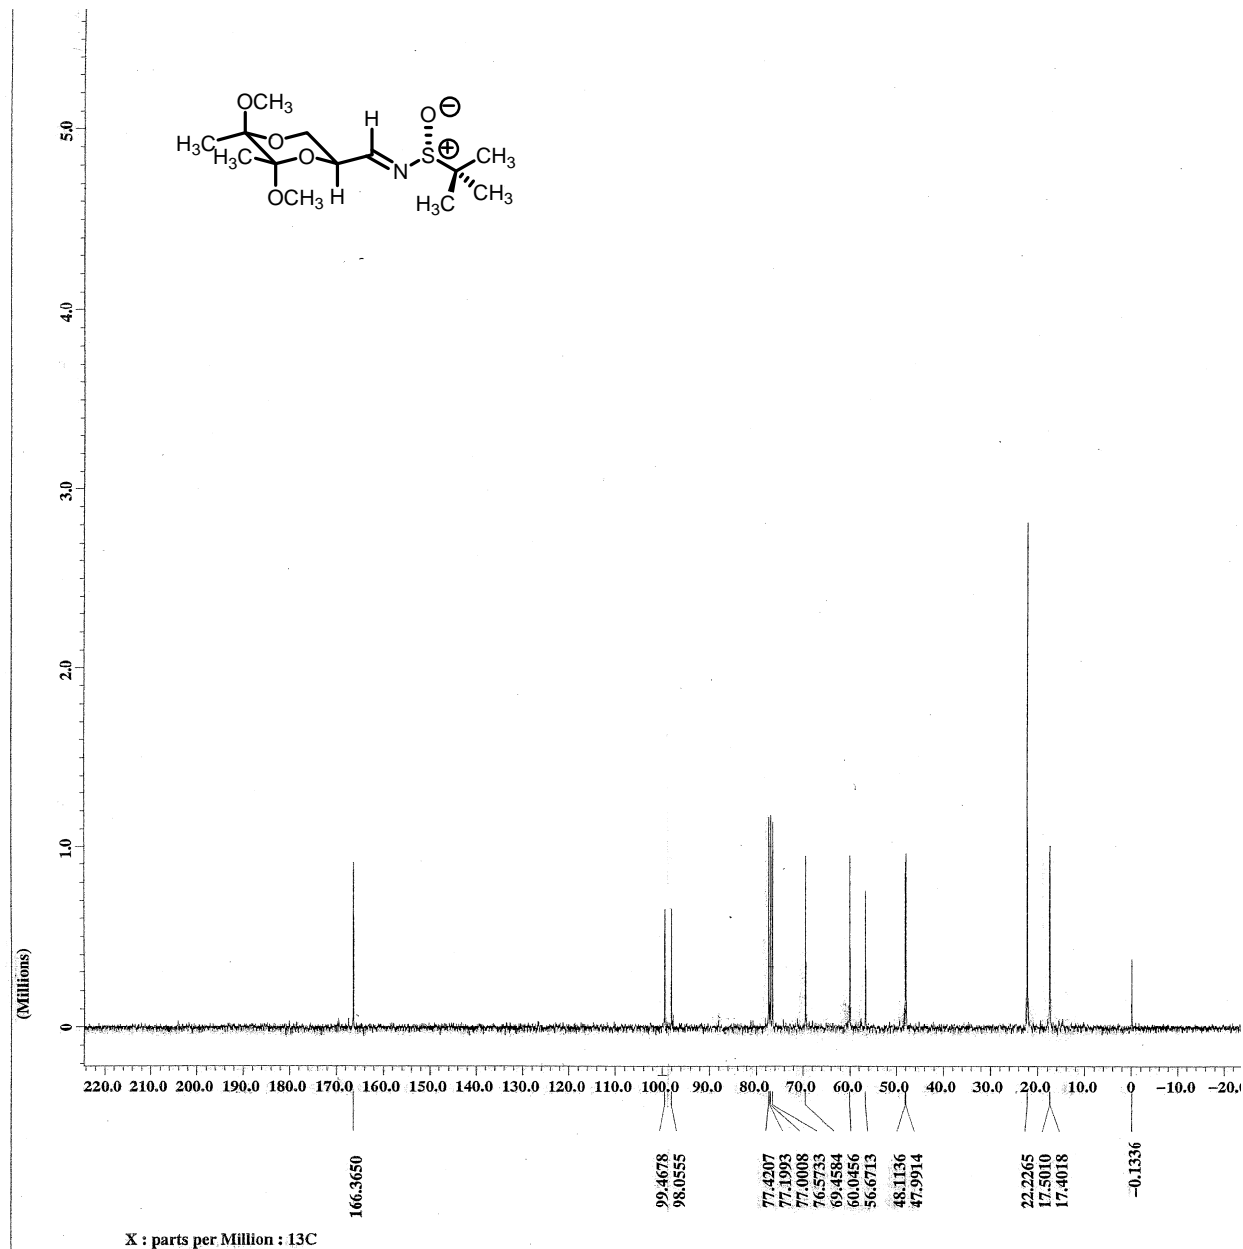

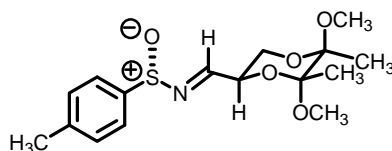

***[S(S), N(E)]-4-methyl-N-(((2S,5R,6R)-5,6-dimethoxy-5,6-dimethyl-1,4-dioxacyclohexyl)methylene]phenylsulfonamide (7)*** From the mixture of 0.310 g (2 mmol) (*S*)-(*p*)-toluenesulfonamide, 0.612 g (3 mmol) (*2R,5R,6R*)-2-(5,6-dimethoxy-5,6-dimethyl-1,4-dioxacyclohexane)carboxyaldehyde and 0.640 g (4 mmol) CuSO<sub>4</sub>, 0.470 g (68%) of the title compound was isolated as an oil after silica gel chromatography. Analytical data:  $[\alpha]_D^{25}$  -75 (*c* 1.0, CHCl<sub>3</sub>), IR (cm<sup>-1</sup>) 2947, 2833, 1718, 1627, 1596, 1447, 1255, 1036; <sup>1</sup>H NMR (75 MHz, CDCl<sub>3</sub>)  $\delta$  8.16 (d, *J* = 2.7, 1H), 7.54-7.51(m, 2H), 7.34-7.28 (m, 2H), 4.75-4.68 (m, 1H), 3.67-3.62 (m, 1H), 3.31 (s, 3H), 3.30-3.23 (m, 1H), 3.22 (s, 3H), 2.40 (s, 3H), 1.34 (s, 3H), 1.29 (s, 3H); <sup>13</sup>C NMR (300 MHz, CDCl<sub>3</sub>)  $\delta$  163.8, 129.8, 129.6, 129.5, 127.8, 127.1, 124.6, 99.7, 98.1, 68.9, 60.0, 48.3, 48.1, 21.1, 17.6, 17.5; TLC R<sub>f</sub> 0.33 (EtOAc/hexane, 3/7); HRMS (ESI) calculated mass 342.1375 (C<sub>16</sub>H<sub>23</sub>NO<sub>5</sub>S (M+H)); found 342.1375.

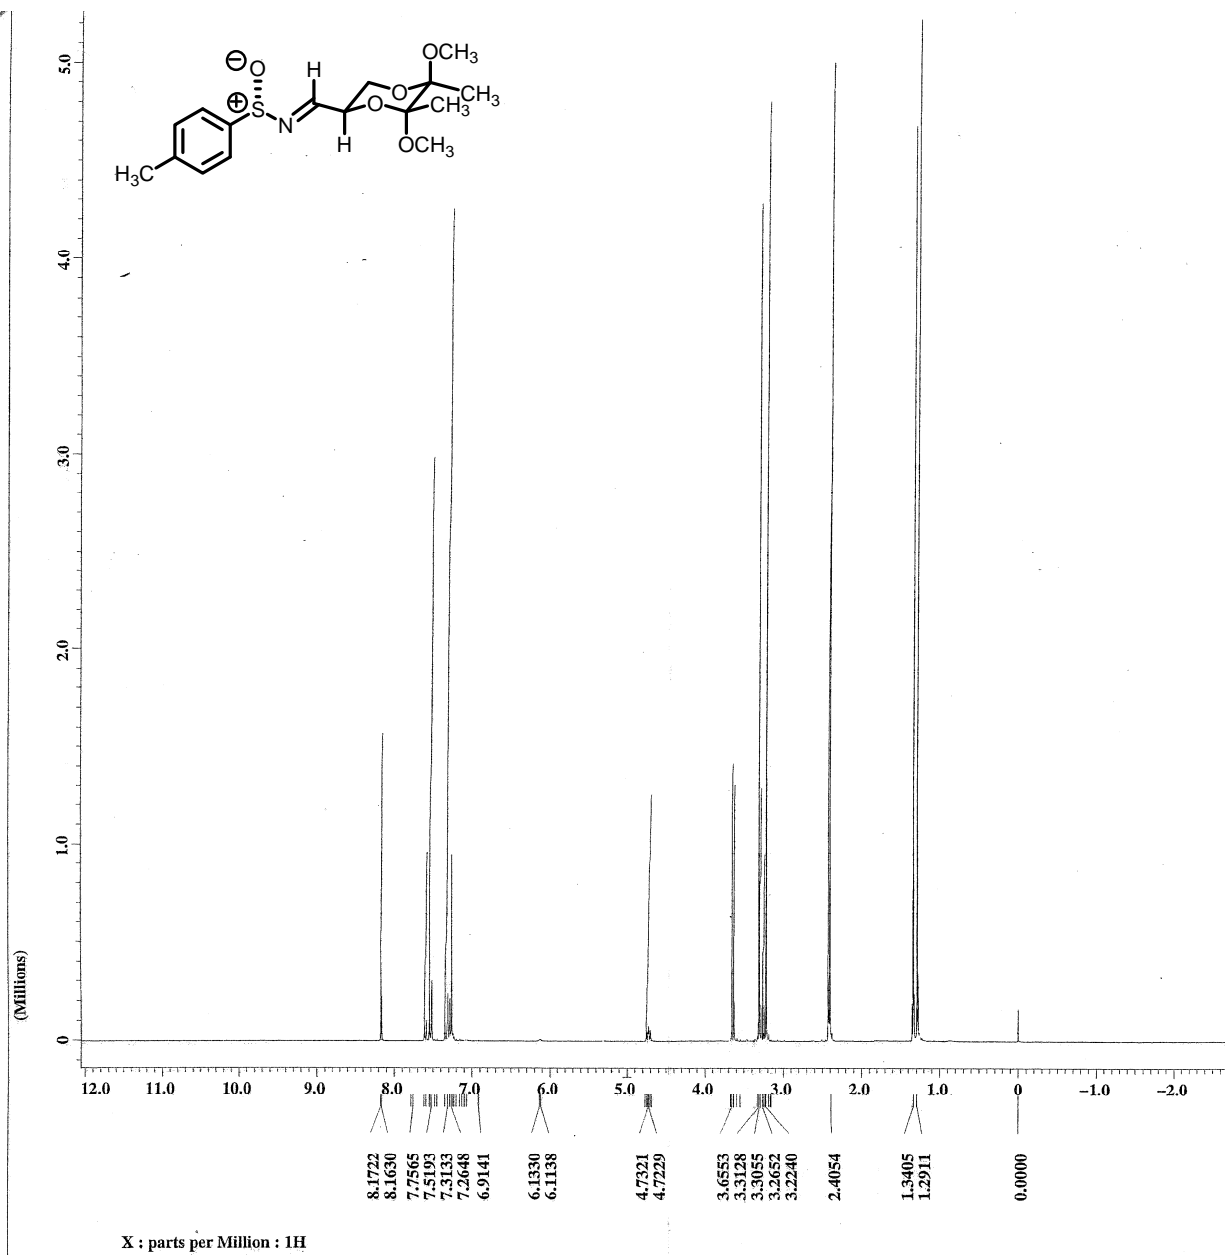



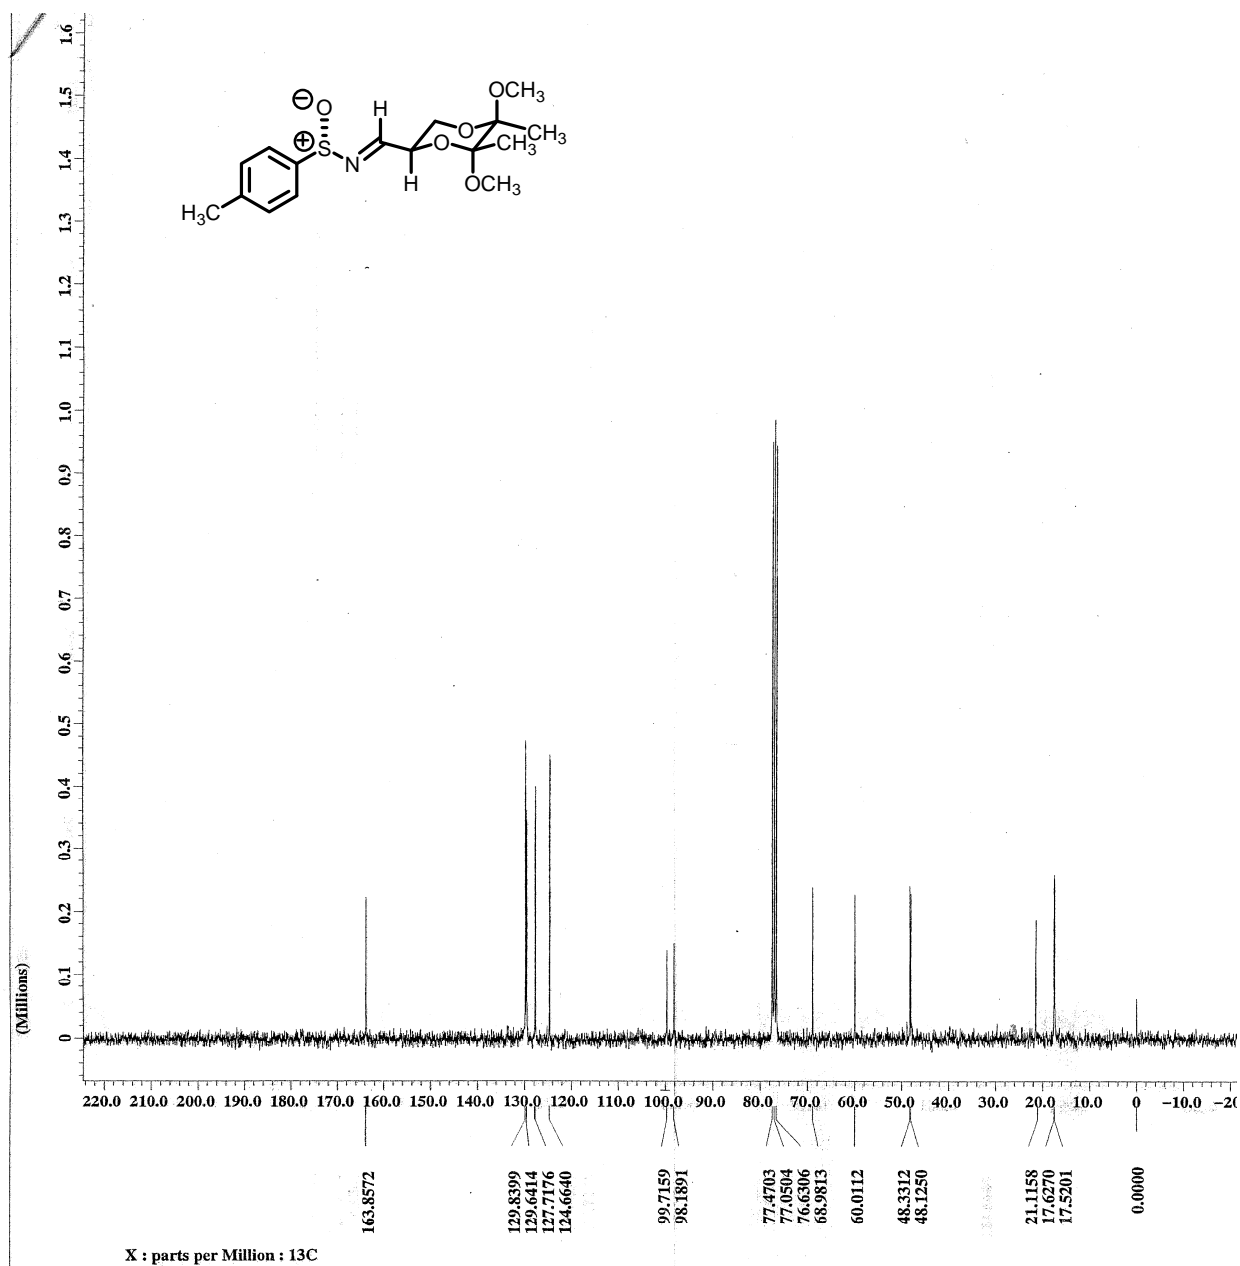

### **Representative procedure for methylene transfers onto butanediactal-protected sulfinyl imines**

An oven-dried 25 mL round-bottomed flask was equipped with a stir bar, septum, and condenser. To this system was added butanediactal-protected sulfinyl imine (1.0 equiv (1.0 mmol)), cesium carbonate (2.0 equiv), THF (3.0 mL) and as a solution, sulfonium salt (1.5 equiv) in THF (2.0 mL). The solution of sulfonium salt was added dropwise over a period of no more than 10min via syringe. The system was externally heated to 80°C (sand bath). The reaction mixture was allowed to stir for a period of 10h to assure completion of reaction. After cooling to room temperature, the reaction mixture was concentrated in vacuo and immediately purified by chromatography using neutral alumina and a gradient eluent system of hexanes and EtOAc (9:1) to afford analytically pure aziridine.

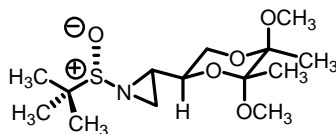

***1-[S(S\*)-(1,1-dimethylethyl)sulfinyl]-2-[(2S\*,5R\*,6R\*)-2-(5,6-dimethoxy-5,6-dimethyl-1,4-dioxacyclohexyl)]aziridine*** From the combination of imine **4** (0.307 g, 1.00 mmol), cesium carbonate (0.652 g, 2.00 mmol), and sulfonium salt **1** (0.498 g, 1.5 mmol) in 2.0 mL of THF, 0.284 g (92% yield) of the title compound was obtained after purification by column chromatography using neutral alumina. Prior to purification, a small aliquot was removed and analyzed by  $^1\text{H}$  NMR. Measured by NMR was a diastereomeric ratio of >95:5. Analytical data: IR ( $\text{cm}^{-1}$ ) 3051, 2950, 1456, 1374, 1267, 1120, 1079;  $^1\text{H}$  NMR (300 MHz,  $\text{CDCl}_3$ )  $\delta$  4.08-4.02 (m, 1H), 3.75-3.67 (dd,  $J = 11.2$ , 1H), 3.51-3.46 (m, 1H), 3.25-3.26 (m, 6H), 2.71-2.68 (m, 1H), 2.18 (d,  $J = 4.1$ , 1H), 2.01 (d,  $J = 7.1$ , 1H), 1.27-1.23 (m, 15H);  $^{13}\text{C}$  NMR (75 MHz,  $\text{CDCl}_3$ )  $\delta$  99.2, 97.9, 65.2, 61.0, 56.7, 47.96, 47.90, 29.9, 24.9, 22.5, 17.6, 17.4; TLC  $R_f$  0.34 (EtOAc/hexane, 1/9); HRMS (ESI) calculated mass 322.1688 ( $\text{C}_{14}\text{H}_{27}\text{NO}_5\text{S}$  (M+H)); found 322.1687.

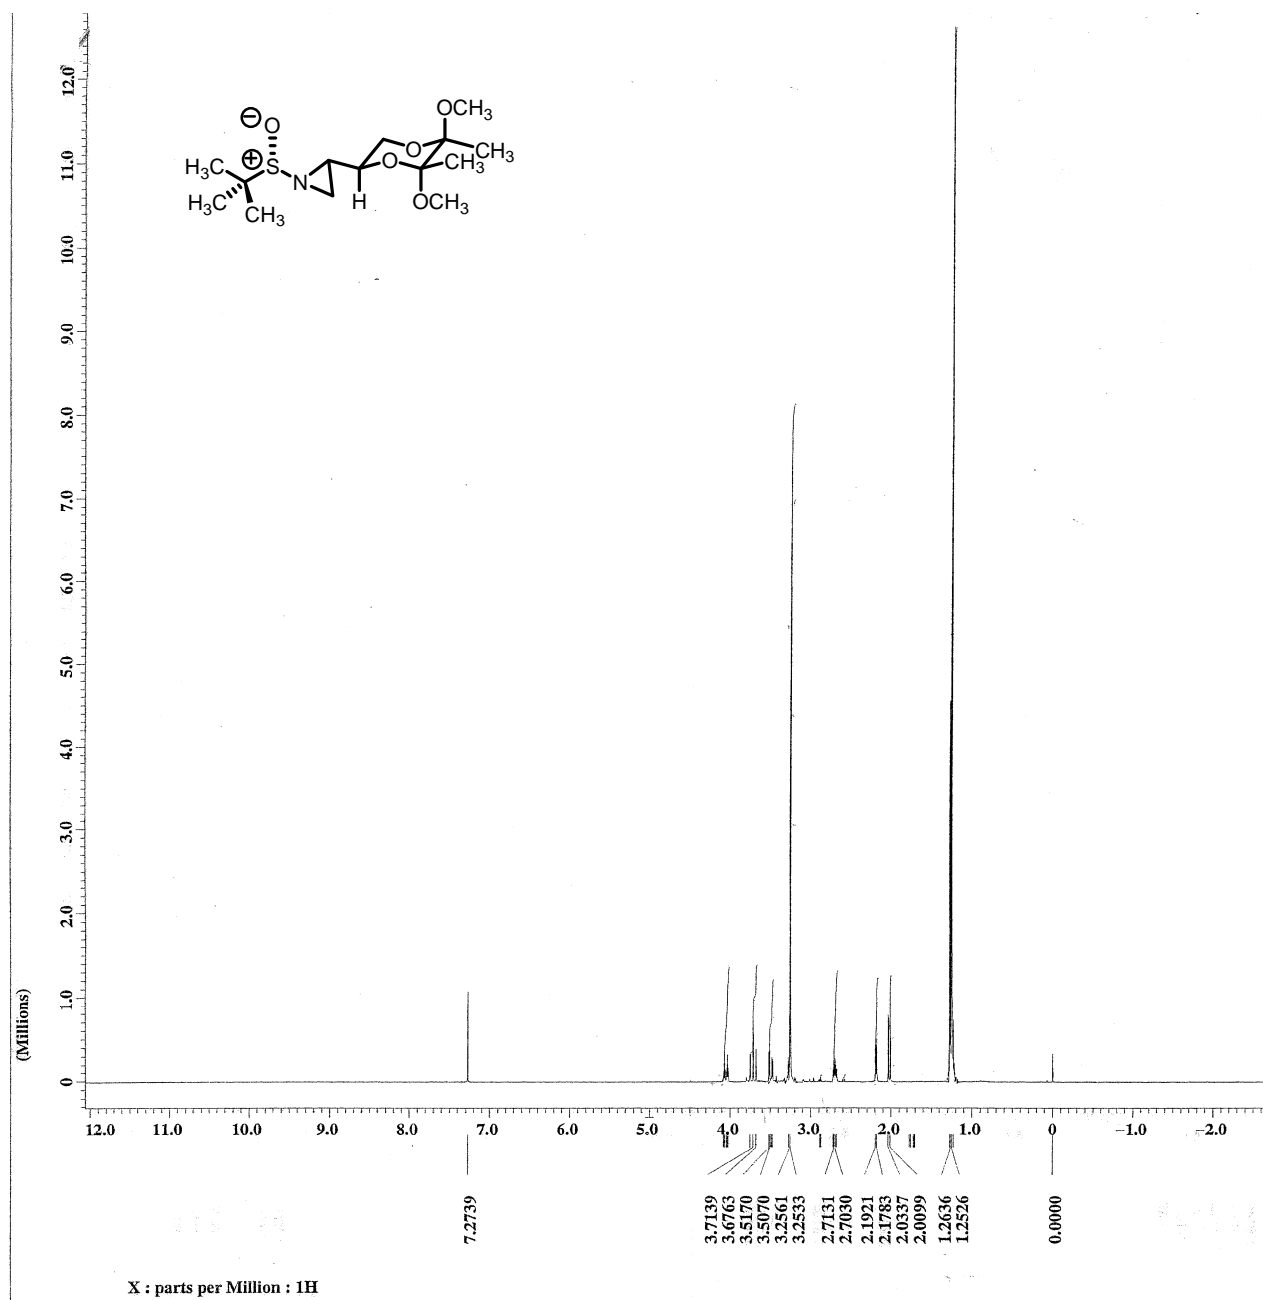

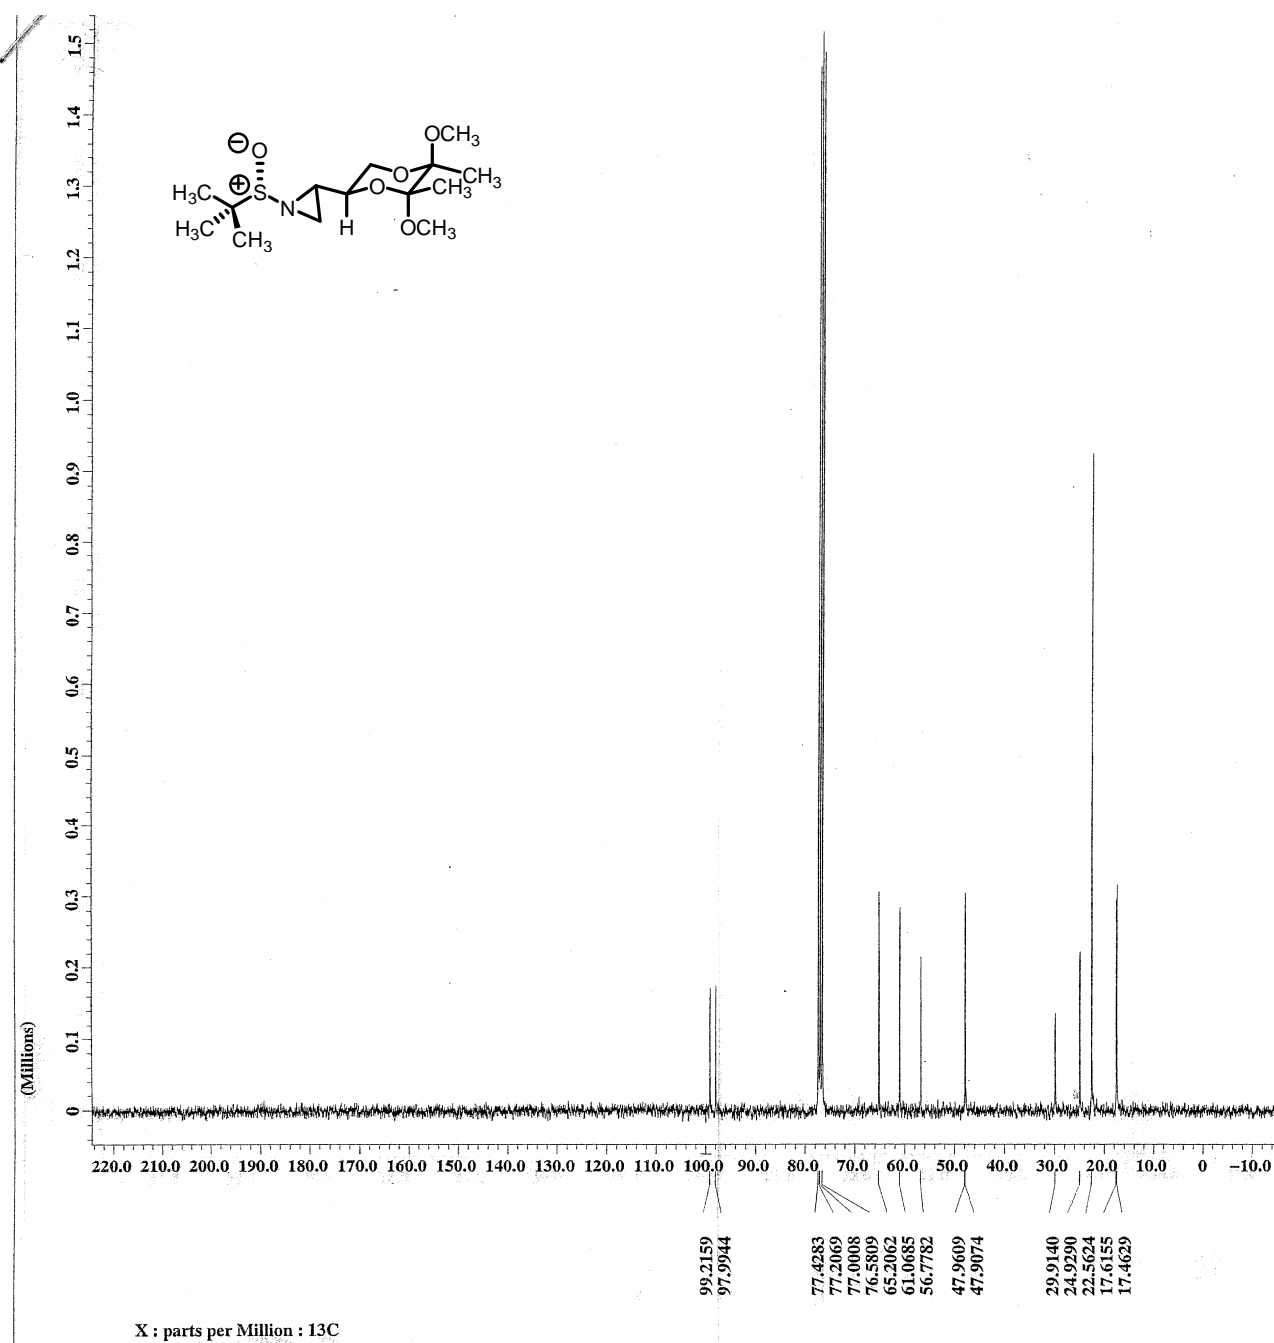

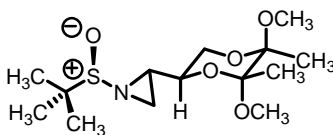

***1-[S(R\*)-(1,1-dimethylethyl)sulfinyl]-2-[(2S\*,5R\*,6R\*)-2-(5,6-dimethoxy-5,6-dimethyl-1,4-dioxacyclohexyl)]aziridine*** From the mixture of imine **5** (0.307 g, 1.00 mmol), cesium carbonate (0.652 g, 2.00 mmol), and sulfonium salt **1** (0.498 g, 1.5 mmol) in 2.0 mL of THF, 0.272 g (88% yield) of the title compound was obtained after purification by column chromatography using neutral alumina. Prior to purification, a small aliquot was removed and analyzed by  $^1\text{H}$  NMR. Measured by NMR was a diastereomeric ratio of 78:22. Analytical data: IR ( $\text{cm}^{-1}$ ) 2951, 2831, 1456, 1373, 1213, 1120, 1076;  $^1\text{H}$  NMR (300 MHz,  $\text{CDCl}_3$ )  $\delta$  3.71-3.64 (m, 2H), 3.40-3.38 (m, 1H), 3.30-3.22 (m, 6H), 2.81-2.75 (m, 1H), 2.04 (d,  $J = 6.7$ , 1H), 1.87-1.84 (m, 1H), 1.29-1.21 (m, 15H);  $^{13}\text{C}$  NMR (75 MHz,  $\text{CDCl}_3$ )  $\delta$  99.1, 99.0, 98.0, 68.9, 68.8, 61.1, 60.4, 60.0, 57.2, 56.8, 32.4, 30.9, 29.8, 29.6, 24.4, 24.3, 24.2, 23.2, 22.6, 22.5, 17.6, 17.5, 17.4; TLC  $R_f$  0.30 (EtOAc/hexane, 1/9); HRMS (ESI) calculated mass 322.1688 ( $\text{C}_{14}\text{H}_{27}\text{NO}_5\text{S}$  ( $\text{M}+\text{H}$ )); found 322.1696.

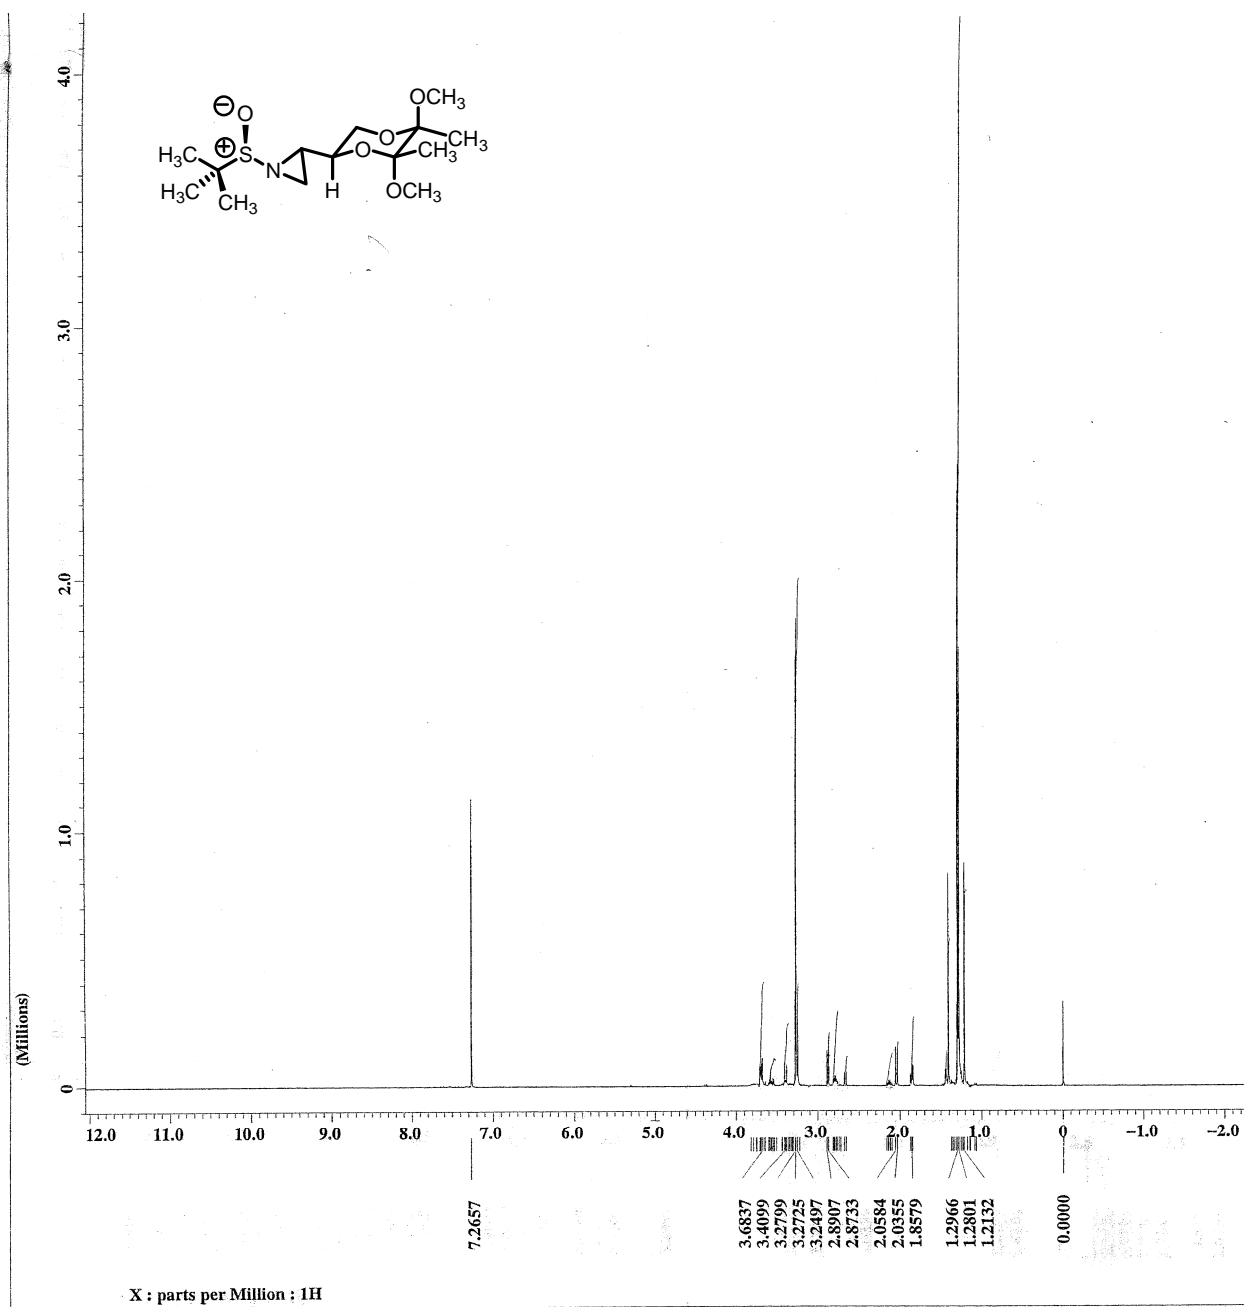

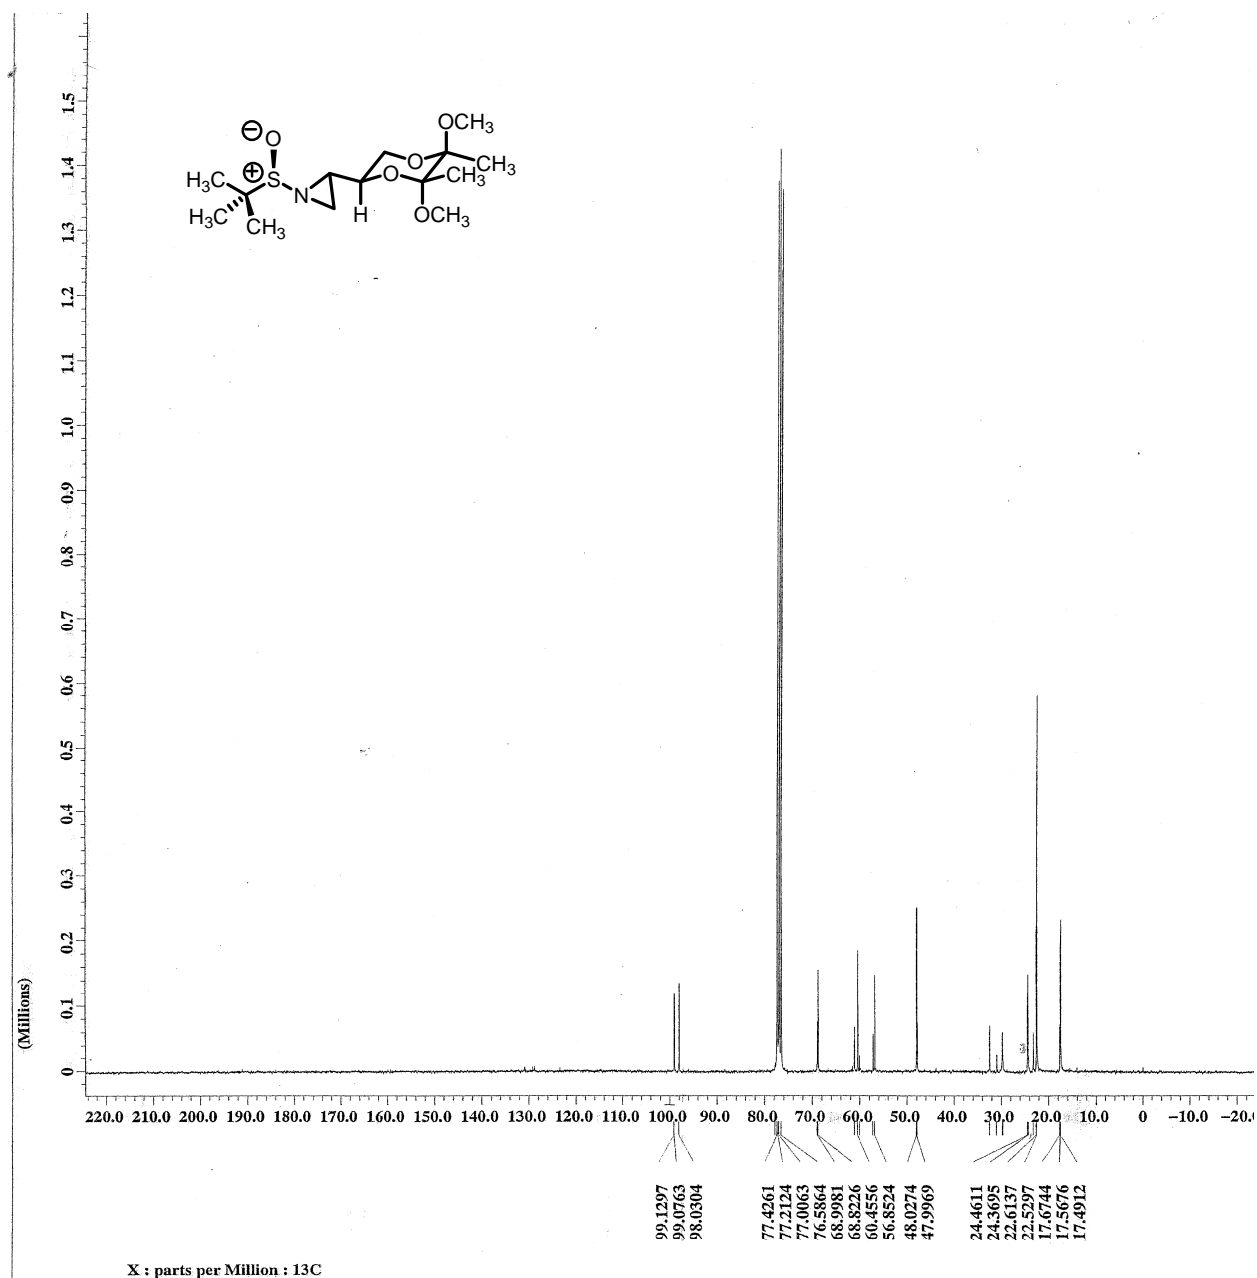



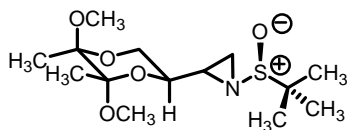

***1-[S(S\*)-(1,1-dimethylethyl)sulfinyl]-2-[(2R\*,5S\*,6S\*)-2-(5,6-dimethoxy-5,6-dimethyl-1,4-dioxacyclohexyl)]aziridine*** From the mixture of imine *ent-5* (0.307 g, 1.00 mmol), cesium carbonate (0.652 g, 2.00 mmol), and sulfonium salt **1** (0.498 g, 1.5 mmol) in 2.0 mL of THF, 0.274 g (89% yield) of the title compound was obtained after purification by column chromatography using neutral alumina. Prior to purification, a small aliquot was removed and analyzed by  $^1\text{H}$  NMR. Measured by NMR was a diastereomeric ratio of 79:21. Analytical data: IR ( $\text{cm}^{-1}$ ) 3051, 2989, 2954, 1454, 1375, 1266, 1120, 1076;  $^1\text{H}$  NMR (300 MHz,  $\text{CDCl}_3$ )  $\delta$  3.71-3.66 (m, 2H), 3.40-3.38 (m, 1H), 3.28-3.25 (m, 6H), 2.80-2.76 (m, 1H), 2.04 (d,  $J = 6.7$ , 1H), 1.87-1.84 (m, 1H), 1.32-1.21 (m, 15H);  $^{13}\text{C}$  NMR (75 MHz,  $\text{CDCl}_3$ )  $\delta$  99.1, 99.0, 98.0, 69.0, 68.8, 61.2, 60.4, 57.2, 56.8, 32.5, 29.8, 24.4, 23.2, 22.6, 22.5, 17.8, 17.6, 17.5; TLC  $R_f$  0.30 (EtOAc/hexane, 2/8); HRMS (ESI) calculated mass 322.1688 ( $\text{C}_{14}\text{H}_{27}\text{NO}_5\text{S}$  ( $\text{M}+\text{H}$ )); found 322.1687.

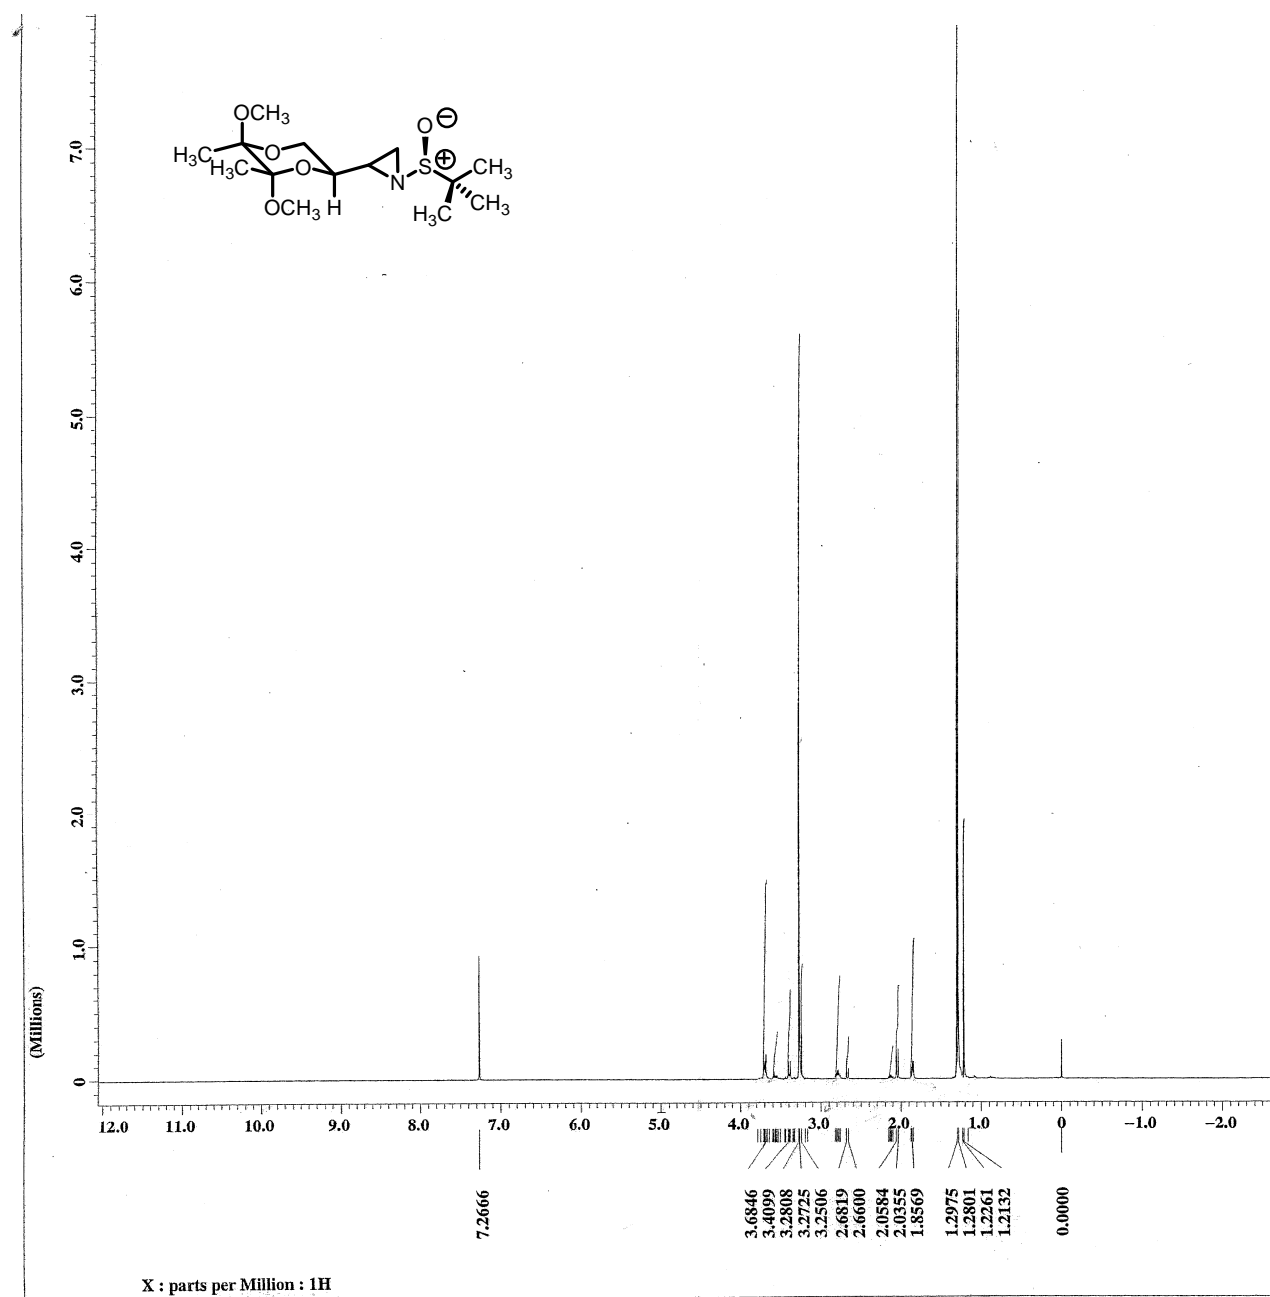

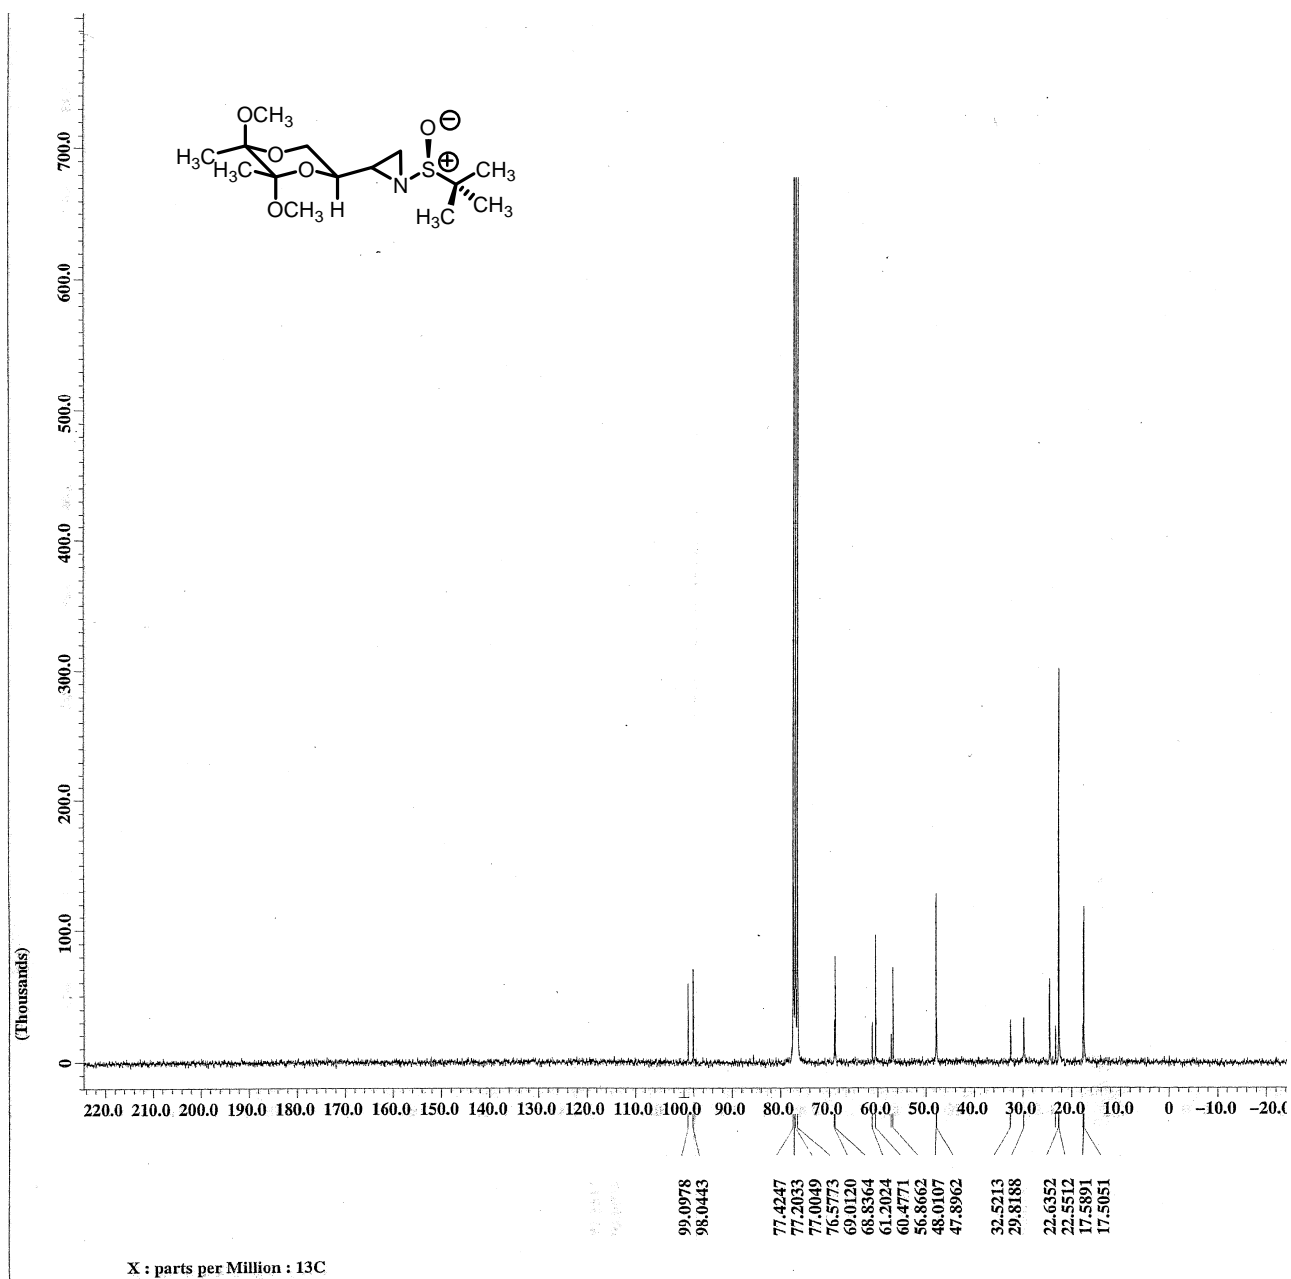

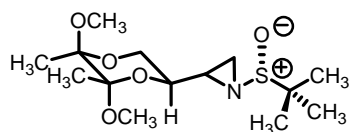

**1-[S(R\*)-(1,1-dimethylethyl)sulfinyl]-2-[(2R\*,5S\*,6S\*)-2-(5,6-dimethoxy-5,6-dimethyl-1,4-dioxacyclohexyl)]aziridine** From the mixture of imine *ent*-**4** (0.307 g, 1.00 mmol), cesium carbonate (0.652 g, 2.00 mmol), and sulfonium salt **1** (0.498 g, 1.5 mmol) in 2.0 mL of THF, 0.289 g (94% yield) of the title compound was obtained after purification by column chromatography using neutral alumina. Prior to purification, a small aliquot was removed and analyzed by  $^1\text{H}$  NMR. Measured by NMR was a diastereomeric ratio of 95:5. Analytical data: IR ( $\text{cm}^{-1}$ ) 2951, 2831, 1456, 1373, 1210, 1120, 1079;  $^1\text{H}$  NMR (300 MHz,  $\text{CDCl}_3$ )  $\delta$  4.07-4.01 (m, 1H), 3.74-3.67 (dd,  $J = 11.0$ ,  $J = 11.0$ , 1H), 3.51-3.46 (m, 1H), 3.25-3.26 (m, 6H), 2.72-2.67 (m, 1H), 2.18 (d,  $J = 4.1$ , 1H), 2.02 (d,  $J = 6.8$ , 1H), 1.27-1.25 (m, 15H);  $^{13}\text{C}$  NMR (75 MHz,  $\text{CDCl}_3$ )  $\delta$  99.2, 98.0, 65.2, 61.0, , 56.7, 47.9, 47.8, 29.9, 24.9, 22.5, 17.6, 17.4; TLC  $R_f$  0.30 (EtOAc/hexane, 2/8); HRMS (ESI) calculated mass 322.1688 ( $\text{C}_{14}\text{H}_{27}\text{NO}_5\text{S}$  (M+H)); found 322.1678.

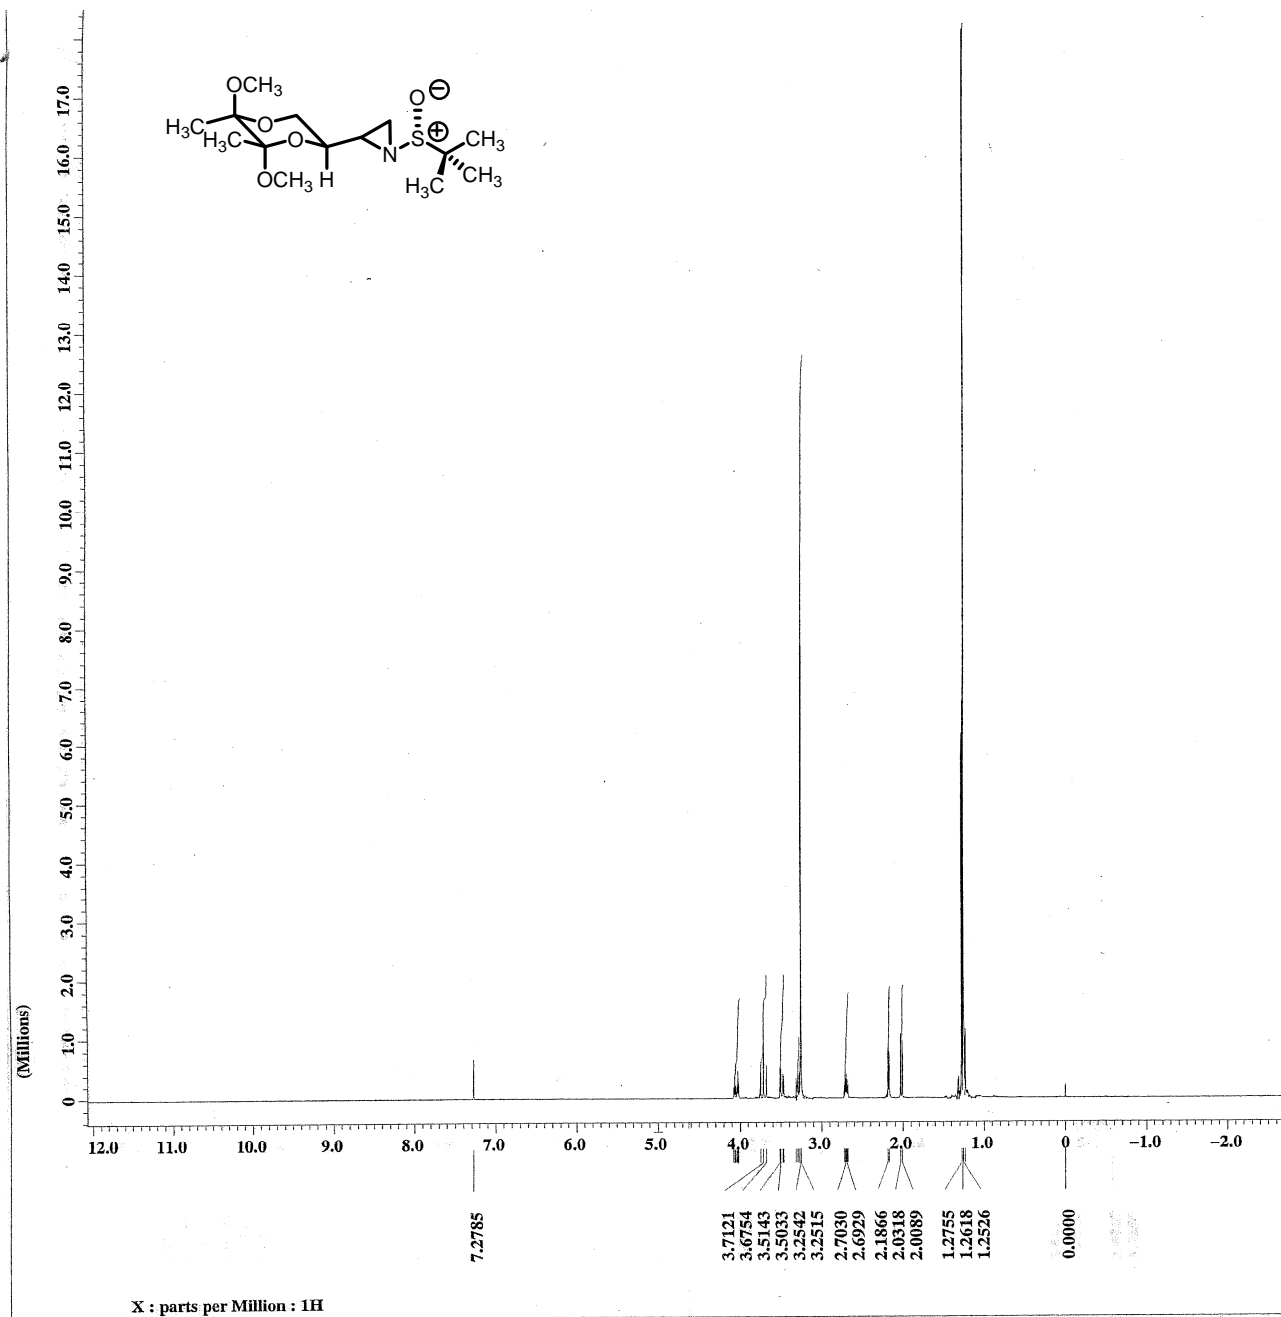

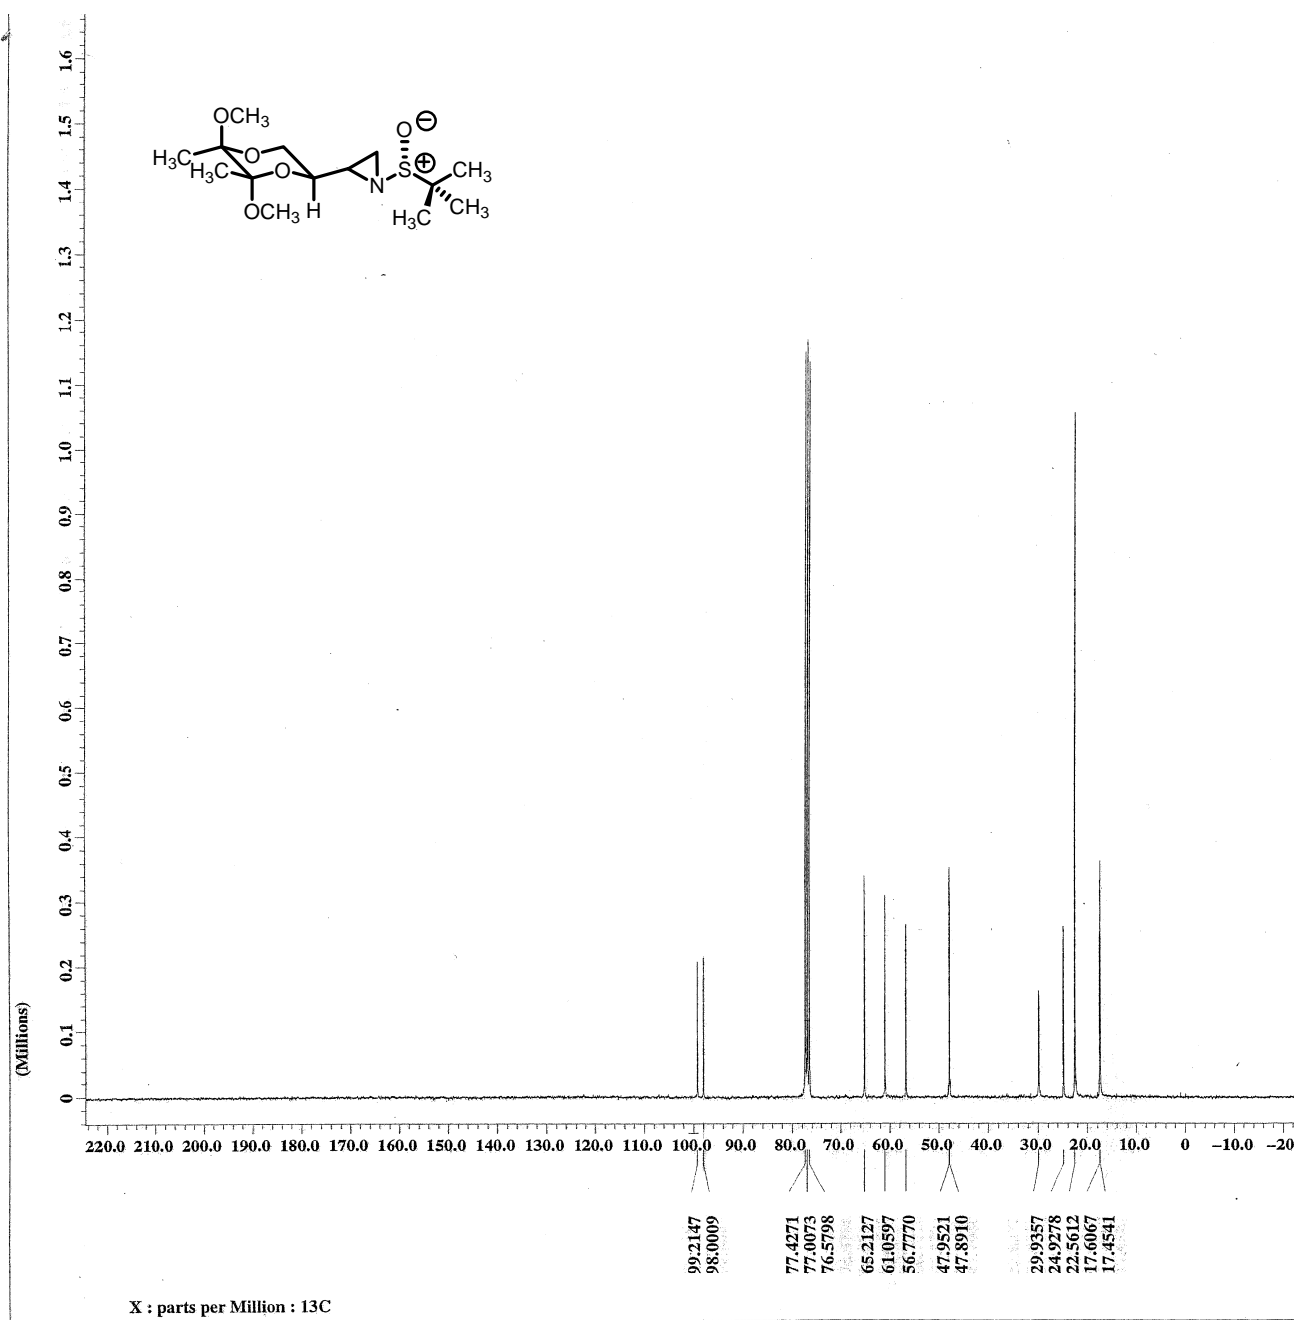

**Control Reaction: Aziridination reaction of 7**

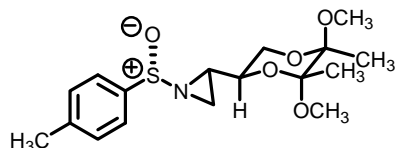

**1-[S(S\*)-(4-methylphenyl)sulfinyl]-2-[(2S\*,5R\*,6R\*)-2-(5,6-dimethoxy-5,6-dimethyl-1,4-dioxacyclohexyl)]aziridine** From the combination of imine **7** (0.341 g, 1.00 mmol), cesium carbonate (0.652 g, 2.00 mmol), and sulfonium salt **1** (0.498 g, 1.5 mmol) in 2.0 mL of THF, 0.284 g (80% yield) of the title compound was obtained after purification by column chromatography using neutral alumina. Prior to purification, a small aliquot was removed and analyzed by  $^1\text{H}$  NMR. Measured by NMR was a diastereomeric ratio of 67:33. Analytical data: IR ( $\text{cm}^{-1}$ ) 2947, 2919, 1446, 1375, 1212, 1119, 1035;  $^1\text{H}$  NMR (300 MHz,  $\text{CDCl}_3$ )  $\delta$  7.60-7.49 (m, 4H), 7.32-7.28 (m, 4H), 3.72-3.70 (m, 2H), 3.45-3.42 (m, 1H), 3.36-3.33 (m, 1H), 3.29 (s, 3H), 3.28 (s, 3H), 3.14 (s, 3H), 3.13 (s, 3H), 3.05-2.98 (m, 2H), 2.56 (d,  $J = 3.0$ , 1H), 2.53-2.44 (m, 4H), 2.41-2.43 (m, 6H), 2.14 (d,  $J = 4.0$ , 1 H), 1.28 (s, 3H), 1.25 (s, 3H), 1.22 (s, 3H), 1.17 (s, 3H);  $^{13}\text{C}$  NMR (75 MHz,  $\text{CDCl}_3$ )  $\delta$  142.0, 141.8, 141.7, 129.5, 129.4, 124.8, 124.5, 99.1, 98.9, 98.0, 97.7, 68.2, 67.9, 60.8, 60.5, 48.1, 48.0, 47.9, 47.8, 34.7, 32.0, 29.6, 28.0, 27.5, 19.7, 17.7, 17.6, 17.5, 17.3; TLC  $R_f$  0.30 (EtOAc/hexane, 2/8); HRMS (ESI) calculated mass 356.1532 ( $\text{C}_{17}\text{H}_{25}\text{NO}_5\text{S}$  ( $\text{M}+\text{H}$ )); found 356.1537.

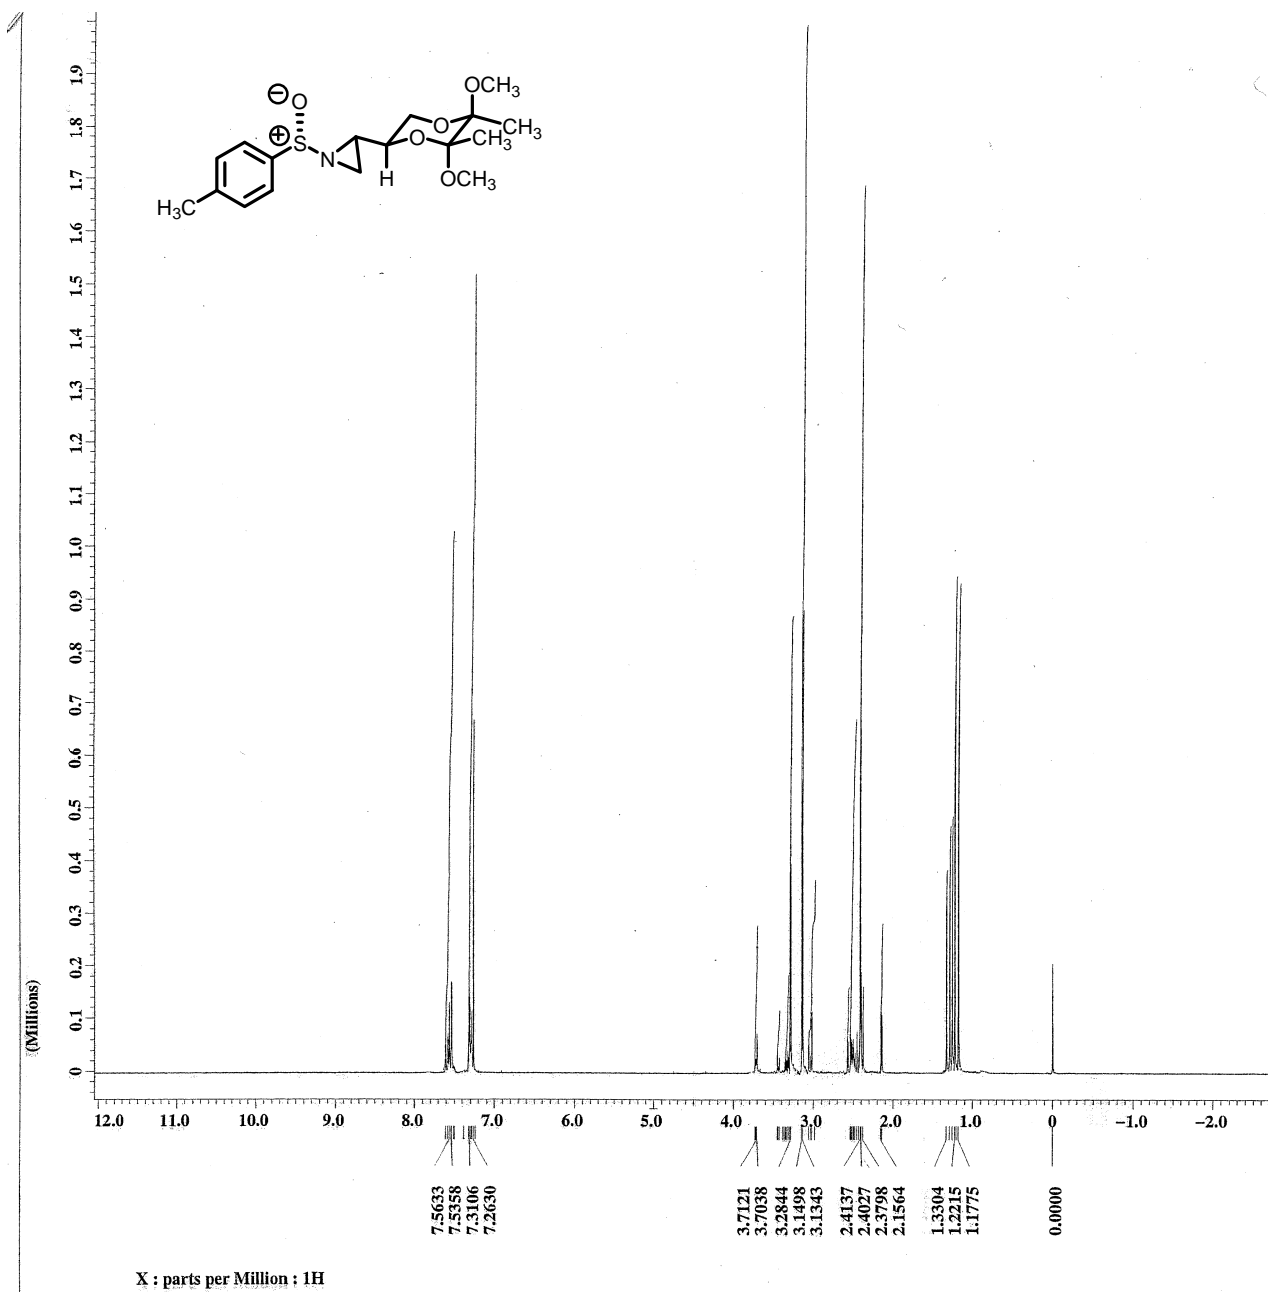



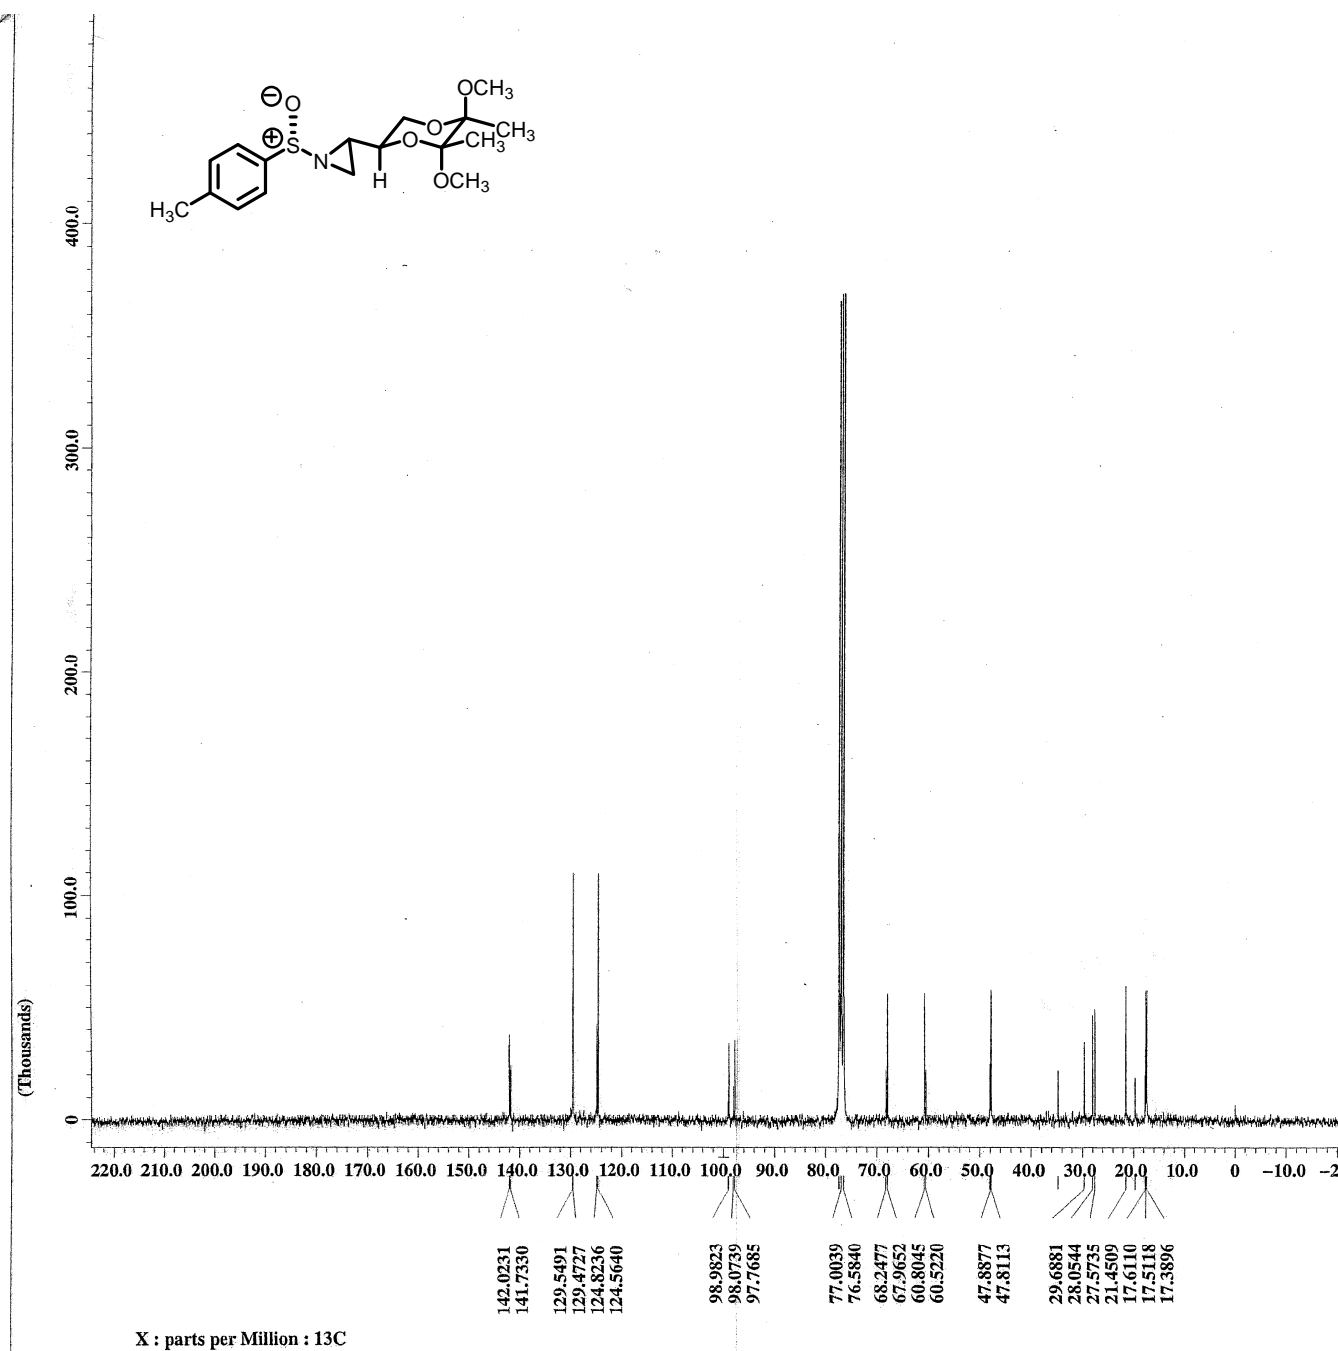

**Control Reaction: Epoxidation reaction of 3**

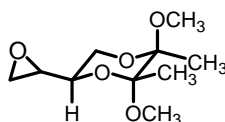

**2-(5,6-Dimethoxy-5,6-dimethyl-1,4-dioxacyclohexane)oxirane** From the combination of (2*R*,5*R*,6*R*)-2-(5,6-dimethoxy-5,6-dimethyl-1,4-dioxacyclohexane)carboxyaldehyde (**3**) (0.204 g, 1.00 mmol), cesium carbonate (0.652 g, 2.00 mmol), and sulfonium salt **1** (0.498 g, 1.5 mmol) in 2.0 mL of THF, 0.176 g (80% yield) of the title compound was obtained after purification by column chromatography using neutral alumina. Prior to purification, a small aliquot was removed and analyzed by  $^1\text{H}$  NMR. Measured by NMR was a diastereomeric ratio of 60:40. Analytical data: IR ( $\text{cm}^{-1}$ ) 2992, 2948, 1373, 1258, 11210, 1035;  $^1\text{H}$  NMR (300 MHz,  $\text{CDCl}_3$ )  $\delta$  3.82-3.75 (m, 1H), 3.73-3.67 (m, 1H), 3.48-3.44 (m, 1H), 3.29-3.24 (m, 6H), 3.00-2.90 (m, 1H), 2.82-2.75 (m, 1H), 2.68-2.64 (m, 1H), 1.32-1.26 (m, 6H);  $^{13}\text{C}$  NMR (75 MHz,  $\text{CDCl}_3$ )  $\delta$  99.0, 98.0, 68.8, 68.2, 60.8, 59.9, 50.6, 48.0, 47.9, 45.1, 43.1, 17.7, 17.5; TLC  $R_f$  0.30 (EtOAc/hexane, 1/9); HRMS (ESI) calculated mass 241.1052 ( $\text{C}_{10}\text{H}_{18}\text{O}_5$  ( $\text{M}+\text{Na}$ )); found 241.1052.

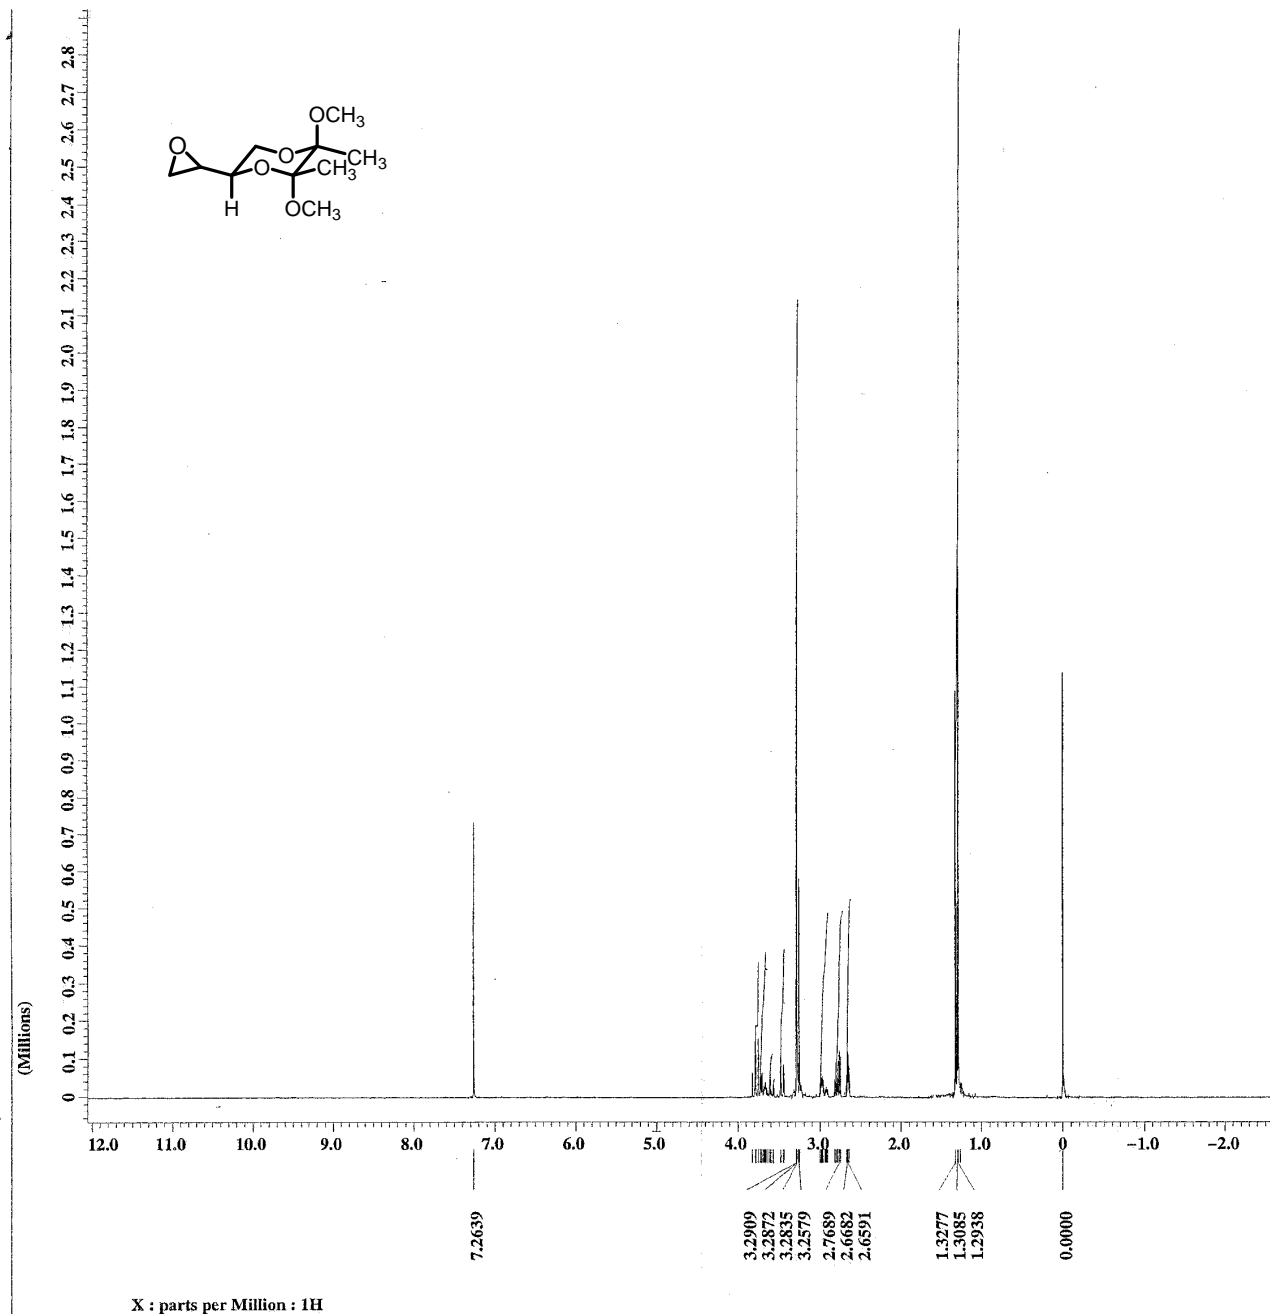

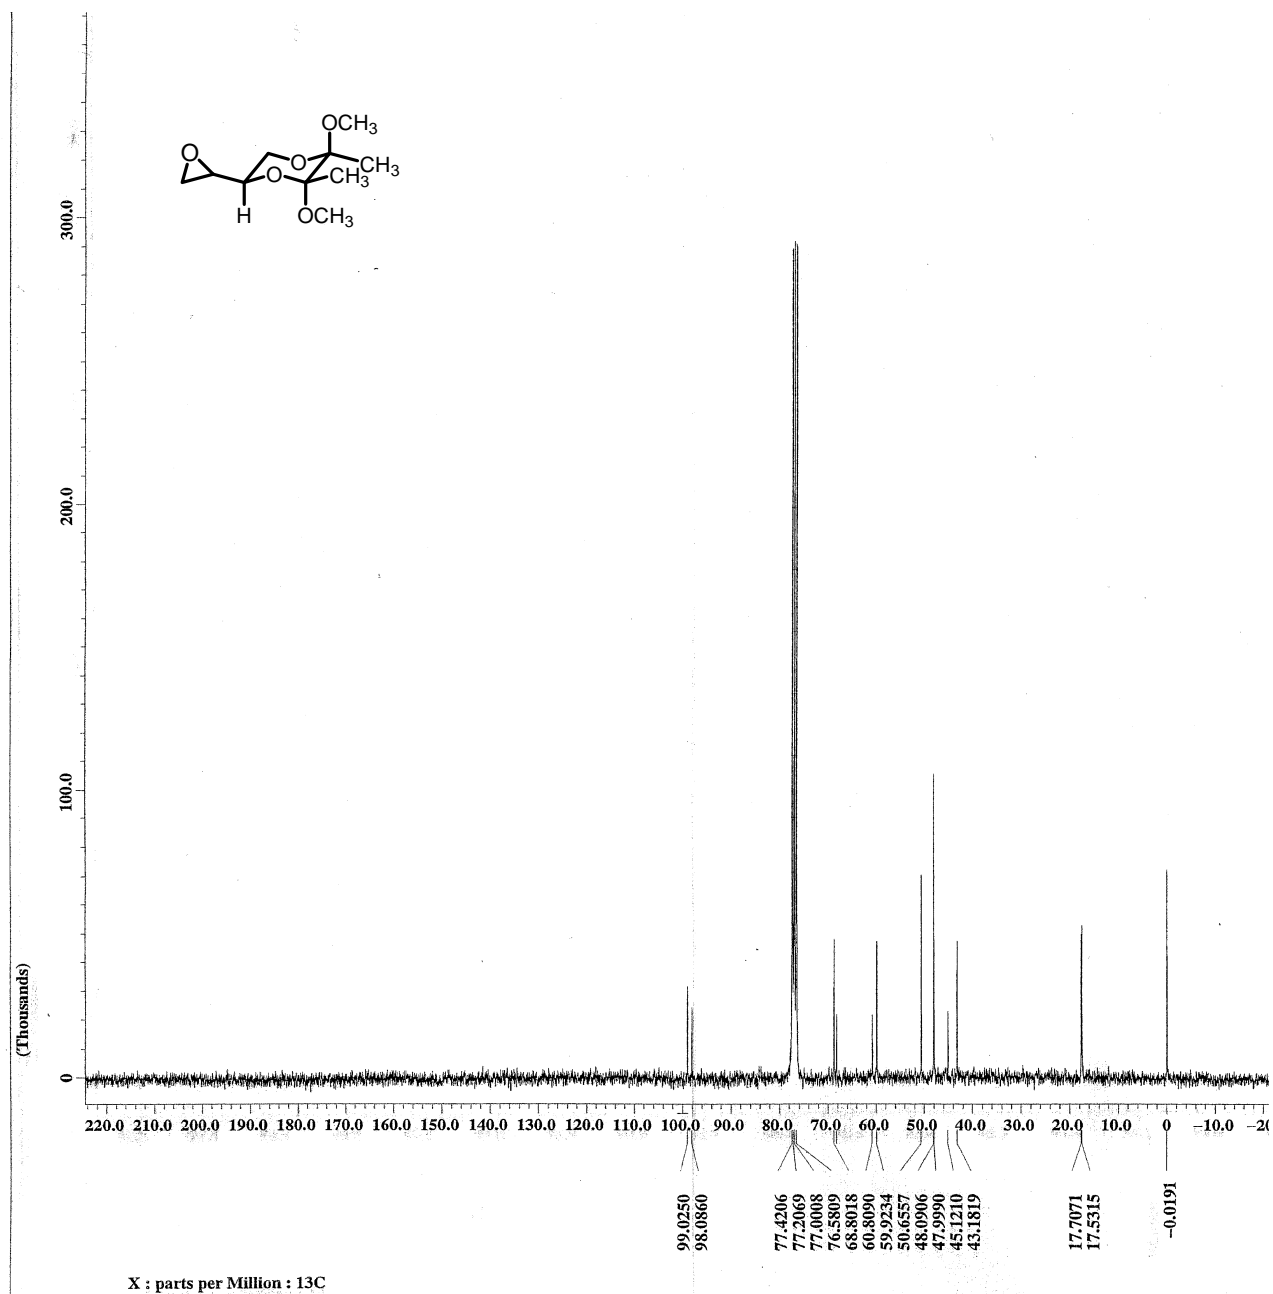

### Control Reaction: Aziridination of **6**

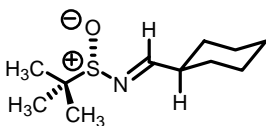

**[S(S), N(E)]-2-methyl-N-[(cyclohexyl)methylene]-2-propanesulfinamide (6)** Using the representative procedure for the preparation of *N*-sulfinyl imines, from the combination of 0.242 g (2 mmol) (*S*)-(-)-2-methyl-2-propane sulfinamide, 0.336 g (3 mmol) cyclohexanecarboxaldehyde, and 0.640 g (4 mmol) CuSO<sub>4</sub>, 0.399 g (92 %) of the title compound was obtained as an oil after purification on silica gel chromatography. The analytical data obtained was consistent with that previously reported.<sup>1</sup>

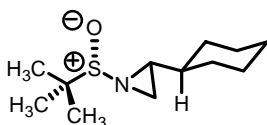

**1-[S(S\*)-(1,1-dimethylethyl)sulfinyl]-2-[cyclohexyl]aziridine** From the combination of imine **6** (0.215 g, 1.00 mmol), cesium carbonate (0.652 g, 2.00 mmol), and sulfonium salt **1** (0.498 g, 1.5 mmol) in 2.0 mL of THF, 0.187 g (81% yield) of the title compound was obtained after purification by column chromatography using neutral alumina. Prior to purification, a small aliquot was removed and analyzed by <sup>1</sup>H NMR. Measured by NMR was a diastereomeric ratio of 61:39. The analytical data obtained was consistent with that previously reported.<sup>1</sup>

### References

- (a) D. D. Staas, K. L. Savage, C. F. Homnick, N. N. Tsou, R.G. Ball, *J. Org. Chem.*, 2002, **61**, 8276; (b) D. Morton, D. Pearson, R. A. Field, R. A. Stockman, *Synlett*, 2003, 1985.
